# Supplementary material
Source: publisher figshare collection journal article supplement (https://future-science-group.figshare.com/ndownloader/files/28760370)
Supplement: Supplementary file 1 [file 28760370]

## Sheet: Appendix A 
Appendix A. NDC, GPI, and HCPCS Codes for Hemophilia-related Therapies
Factor VIII Therapy
Factor	Description	NDC ID	GPI Code
VIII	ANTIHEMOPHILIC FACTOR RAHF-PFM FOR INJ 1500 UNIT	944294004	85100010*
VIII	ANTIHEMOPHILIC FACTOR RAHF-PFM FOR INJ 250 UNIT	944294001	85100010*
VIII	ANTIHEMOPHILIC FACTOR RAHF-PFM FOR INJ 2000 UNIT	944294010	85100010*
VIII	ANTIHEMOPHILIC FACTOR RAHF-PFM FOR INJ 250 UNIT	944294110	85100010*
VIII	ANTIHEMOPHILIC FACTOR RAHF-PFM FOR INJ 500 UNIT	944294210	85100010*
VIII	ANTIHEMOPHILIC FACTOR RAHF-PFM FOR INJ 500 UNIT	944294002	85100010*
VIII	ANTIHEMOPHILIC FACTOR RAHF-PFM FOR INJ 3000 UNIT	944294610	85100010*
VIII	ANTIHEMOPHILIC FACTOR RAHF-PFM FOR INJ 1000 UNIT	944294310	85100010*
VIII	ANTIHEMOPHILIC FACTOR RAHF-PFM FOR INJ 1500 UNIT	944294410	85100010*
VIII	ANTIHEMOPHILIC FACTOR RAHF-PFM FOR INJ 1500 UNIT	944292402	85100010*
VIII	ANTIHEMOPHILIC FACTOR RAHF-PFM FOR INJ 500 UNIT	944292202	85100010*
VIII	ANTIHEMOPHILIC FACTOR RAHF-PFM FOR INJ 1000 UNIT	944292302	85100010*
VIII	ANTIHEMOPHILIC FACTOR RAHF-PFM FOR INJ 250 UNIT	944292102	85100010*
VIII	ANTIHEMOPHILIC FACTOR RAHF-PFM FOR INJ 1000 UNIT	944294003	85100010*
VIII	ANTIHEMOPHILIC FACTOR RAHF-PFM FOR INJ 2000 UNIT	944294510	85100010*
VIII	ANTIHEMOPHILIC FACTOR RAHF-PFM FOR INJ 250 UNIT	944305102	85100010*
VIII	ANTIHEMOPHILIC FACTOR RAHF-PFM FOR INJ 1000 UNIT	944305302	85100010*
VIII	ANTIHEMOPHILIC FACTOR RAHF-PFM FOR INJ 250 UNIT	944296010	85100010*
VIII	ANTIHEMOPHILIC FACTOR RAHF-PFM FOR INJ 1000 UNIT	944296210	85100010*
VIII	ANTIHEMOPHILIC FACTOR RAHF-PFM FOR INJ 2000 UNIT	944296410	85100010*
VIII	ANTIHEMOPHILIC FACTOR RAHF-PFM FOR INJ 1500 UNIT	944305402	85100010*
VIII	ANTIHEMOPHILIC FACTOR RAHF-PFM FOR INJ 3000 UNIT	944304610	85100010*
VIII	ANTIHEMOPHILIC FACTOR RAHF-PFM FOR INJ 4000 UNIT	944304710	85100010*
VIII	ANTIHEMOPHILIC FACTOR RAHF-PFM FOR INJ 2000 UNIT	944304510	85100010*
VIII	ANTIHEMOPHILIC FACTOR RAHF-PFM FOR INJ 500 UNIT	944305202	85100010*
VIII	ANTIHEMOPHILIC FACTOR RAHF-PFM FOR INJ 4000 UNIT	944294810	85100010*
VIII	ANTIHEMOPHILIC FACTOR RAHF-PFM FOR INJ 500 UNIT	944296110	85100010*
VIII	ANTIHEMOPHILIC FACTOR RAHF-PFM FOR INJ 1500 UNIT	944296310	85100010*
VIII	ANTIHEMOPHILIC FACTOR RAHF-PFM FOR INJ 3000 UNIT	944296510	85100010*
VIII	ANTIHEMOPHILIC FACTOR (HUMAN) FOR INJ 500-1500 IU	49669450001	85100010*
VIII	ANTIHEMOPHILIC FACTOR (HUMAN) FOR INJ 250-500 UNIT	49669460001	85100010*
VIII	ANTIHEMOPHILIC FACTOR (HUMAN) FOR INJ 1000-1500 UNIT	49669460002	85100010*
VIII	ANTIHEMOPHILIC FACTOR (HUMAN) FOR INJ 250-500 UNIT	68516460001	85100010*
VIII	ANTIHEMOPHILIC FACTOR (HUMAN) FOR INJ 1000-1500 UNIT	68516460002	85100010*
VIII	ANTIHEMOPHILIC FACTOR/VWF (HUMAN) FOR INJ 1000 UNIT	68516460302	85100010*
VIII	ANTIHEMOPHILIC FACTOR/VWF (HUMAN) FOR INJ 250 UNIT	68516460101	85100010*
VIII	ANTIHEMOPHILIC FACTOR/VWF (HUMAN) FOR INJ 500 UNIT	68516460201	85100010*
VIII	ANTIHEMOPHILIC FACTOR/VWF (HUMAN) FOR INJ 1500 UNIT	68516460402	85100010*
VIII	ANTIHEMOPHILIC FACTOR/VWF (HUMAN) FOR INJ 250 UNIT	68516460501	85100010*
VIII	ANTIHEMOPHILIC FACTOR/VWF (HUMAN) FOR INJ 500 UNIT	68516460601	85100010*
VIII	ANTIHEMOPHILIC FACTOR/VWF (HUMAN) FOR INJ 2000 UNIT	68516461002	85100010*
VIII	ANTIHEMOPHILIC FACTOR/VWF (HUMAN) FOR INJ 2000 UNIT	68516460902	85100010*
VIII	ANTIHEMOPHILIC FACTOR/VWF (HUMAN) FOR INJ 1500 UNIT	68516460802	85100010*
VIII	ANTIHEMOPHILIC FACTOR/VWF (HUMAN) FOR INJ 1000 UNIT	68516460702	85100010*
VIII	ANTIHEMOPHILIC FACTOR (RECOMBINANT) FOR INJ 250 UNIT	53811001	85100010*
VIII	ANTIHEMOPHILIC FACTOR (RECOMBINANT) FOR INJ 500 UNIT	53811002	85100010*
VIII	ANTIHEMOPHILIC FACTOR (RECOMBINANT) FOR INJ 1000 UNIT	53811004	85100010*
VIII	FACTOR VIII CONCENTRATE (HUMAN) FOR INJ KIT 1000-1600 UNIT	63833051802	85100010*
VIII	ANTIHEMOPHILIC FACTOR (RECOMB) RFVIIIFC FOR INJ 250 UNIT	64406080101	85100010*
VIII	ANTIHEMOPHILIC FACTOR (RECOMB) RFVIIIFC FOR INJ 2000 UNIT	64406080601	85100010*
VIII	ANTIHEMOPHILIC FACTOR (RECOMB) RFVIIIFC FOR INJ 3000 UNIT	64406080701	85100010*
VIII	ANTIHEMOPHILIC FACTOR (RECOMB) RFVIIIFC FOR INJ 750 UNIT	64406080301	85100010*
VIII	ANTIHEMOPHILIC FACTOR (RECOMB) RFVIIIFC FOR INJ 1000 UNIT	64406080401	85100010*
VIII	ANTIHEMOPHILIC FACTOR (RECOMB) RFVIIIFC FOR INJ 500 UNIT	64406080201	85100010*
VIII	ANTIHEMOPHILIC FACTOR (RECOMB) RFVIIIFC FOR INJ 1500 UNIT	64406080501	85100010*
VIII	ANTIHEMOPHILIC FACTOR (RECOMB) RFVIIIFC FOR INJ 250 UNIT	64406048308	85100010*
VIII	ANTIHEMOPHILIC FACTOR (RECOMB) RFVIIIFC FOR INJ 750 UNIT	64406048508	85100010*
VIII	ANTIHEMOPHILIC FACTOR (RECOMB) RFVIIIFC FOR INJ 500 UNIT	64406048408	85100010*
VIII	ANTIHEMOPHILIC FACTOR (RECOMB) RFVIIIFC FOR INJ 2000 UNIT	64406048808	85100010*
VIII	ANTIHEMOPHILIC FACTOR (RECOMB) RFVIIIFC FOR INJ 1500 UNIT	64406048708	85100010*
VIII	ANTIHEMOPHILIC FACTOR (RECOMB) RFVIIIFC FOR INJ 1000 UNIT	64406048608	85100010*
VIII	ANTIHEMOPHILIC FACTOR (RECOMB) RFVIIIFC FOR INJ 3000 UNIT	64406048908	85100010*
VIII	ANTIHEMOPHILIC FACTOR (HUMAN) FOR INJ 200-500 IU	13143032152	85100010*
VIII	ANTIHEMOPHILIC FACTOR (HUMAN) FOR INJ 500-1200 IU	13143032153	85100010*
VIII	ANTIHEMOPHILIC FACTOR FOR INJ 500 AHFU	53764102	85100010*
VIII	ANTIHEMOPHILIC FACTOR FOR INJ 700 AHFU	53764202	85100010*
VIII	ANTIHEMOPHILIC FACTOR FOR INJ 1000 AHFU	53764302	85100010*
VIII	ANTIHEMOPHILIC FACTOR FOR INJ 225 AHFU	53765502	85100010*
VIII	ANTIHEMOPHILIC FACTOR FOR INJ 275 AHFU	53766002	85100010*
VIII	ANTIHEMOPHILIC FACTOR FOR INJ 325 AHFU	53766502	85100010*
VIII	ANTIHEMOPHILIC FACTOR FOR INJ 375 AHFU	53766602	85100010*
VIII	ANTIHEMOPHILIC FACTOR FOR INJ 250 AHFU	53764402	85100010*
VIII	ANTIHEMOPHILIC FACTOR FOR INJ 500 AHFU	53764502	85100010*
VIII	ANTIHEMOPHILIC FACTOR FOR INJ 1000 AHFU	53764802	85100010*
VIII	ANTIHEMOPHILIC FACTOR FOR INJ 1500 AHFU	53764902	85100010*
VIII	ANTIHEMOPHILIC FACTOR (RECOMBINANT) FOR INJ 1000 UNIT	52769046410	85100010*
VIII	ANTIHEMOPHILIC FACTOR (RECOMBINANT) FOR INJ 250 UNIT	52769046402	85100010*
VIII	ANTIHEMOPHILIC FACTOR (RECOMBINANT) FOR INJ 500 UNIT	52769046405	85100010*
VIII	ANTIHEMOPHILIC FACTOR (RECOMBINANT) FOR INJ KIT 250 IU	53812001	85100010*
VIII	ANTIHEMOPHILIC FACTOR (RECOMBINANT) FOR INJ KIT 500 UNIT	53812002	85100010*
VIII	ANTIHEMOPHILIC FACTOR (RECOMBINANT) FOR INJ KIT 1000 UNIT	53812004	85100010*
VIII	ANTIHEMOPHILIC FACTOR (RECOMBINANT) FOR INJ KIT 500 UNIT	53813202	85100010*
VIII	ANTIHEMOPHILIC FACTOR (RECOMBINANT) FOR INJ KIT 2000 UNIT	53813402	85100010*
VIII	ANTIHEMOPHILIC FACTOR (RECOMBINANT) FOR INJ KIT 2000 UNIT	53813005	85100010*
VIII	ANTIHEMOPHILIC FACTOR (RECOMBINANT) FOR INJ KIT 250 UNIT	53813001	85100010*
VIII	ANTIHEMOPHILIC FACTOR (RECOMBINANT) FOR INJ KIT 500 UNIT	53813002	85100010*
VIII	ANTIHEMOPHILIC FACTOR (RECOMBINANT) FOR INJ KIT 1000 UNIT	53813004	85100010*
VIII	ANTIHEMOPHILIC FACTOR (RECOMBINANT) FOR INJ KIT 1000 UNIT	53813302	85100010*
VIII	ANTIHEMOPHILIC FACTOR (RECOMBINANT) FOR INJ KIT 3000 UNIT	53813502	85100010*
VIII	ANTIHEMOPHILIC FACTOR (RECOMBINANT) FOR INJ KIT 250 UNIT	53813102	85100010*
VIII	ANTIHEMOPHILIC FACTOR (HUMAN) FOR INJ 401-800 UNIT	944293101	85100010*
VIII	ANTIHEMOPHILIC FACTOR (HUMAN) FOR INJ 1501-2000 UNIT	944293301	85100010*
VIII	ANTIHEMOPHILIC FACTOR (HUMAN) FOR INJ 801-1700 UNIT	944293503	85100010*
VIII	ANTIHEMOPHILIC FACTOR (HUMAN) FOR INJ 401-800 UNIT	944293502	85100010*
VIII	ANTIHEMOPHILIC FACTOR (HUMAN) FOR INJ 801-1500 UNIT	944293201	85100010*
VIII	ANTIHEMOPHILIC FACTOR (HUMAN) FOR INJ 220-400 UNIT	944293001	85100010*
VIII	ANTIHEMOPHILIC FACTOR (HUMAN) FOR INJ 220-400 UNIT	944293501	85100010*
VIII	ANTIHEMOPHILIC FACTOR (HUMAN) FOR INJ 1701-2000 UNIT	944293504	85100010*
VIII	ANTIHEMOPHILIC FACTOR (HUMAN) FOR INJ 1000 UNIT	944394402	85100010*
VIII	ANTIHEMOPHILIC FACTOR (HUMAN) FOR INJ 1700 UNIT	944394602	85100010*
VIII	ANTIHEMOPHILIC FACTOR (HUMAN) FOR INJ 250 UNIT	944394002	85100010*
VIII	ANTIHEMOPHILIC FACTOR (HUMAN) FOR INJ 500 UNIT	944394202	85100010*
VIII	ANTIHEMOPHILIC FACTOR FOR INJ 225 AHFU	53765701	85100010*
VIII	ANTIHEMOPHILIC FACTOR FOR INJ 275 AHFU	53765702	85100010*
VIII	ANTIHEMOPHILIC FACTOR FOR INJ 325 AHFU	53765703	85100010*
VIII	ANTIHEMOPHILIC FACTOR FOR INJ 375 AHFU	53765704	85100010*
VIII	ANTIHEMOPHILIC FACTOR FOR INJ 500 AHFU	53765705	85100010*
VIII	ANTIHEMOPHILIC FACTOR FOR INJ 700 AHFU	53765706	85100010*
VIII	ANTIHEMOPHILIC FACTOR FOR INJ 1000 AHFU	53765707	85100010*
VIII	ANTIHEMOPHILIC FACTOR FOR INJ 250 AHFU	53766101	85100010*
VIII	ANTIHEMOPHILIC FACTOR FOR INJ 500 AHFU	53766102	85100010*
VIII	ANTIHEMOPHILIC FACTOR FOR INJ 1000 AHFU	53766103	85100010*
VIII	ANTIHEMOPHILIC FACTOR FOR INJ 1500 AHFU	53766104	85100010*
VIII	ANTIHEMOPHILIC FACTOR/VWF (HUMAN) FOR INJ 250-500 UNIT	53762005	85100010*
VIII	ANTIHEMOPHILIC FACTOR/VWF (HUMAN) FOR INJ 250-600 UNIT	63833061502	85100015*
VIII	ANTIHEMOPHILIC FACTOR/VWF (HUMAN) FOR INJ 500-1200 UNIT	63833061602	85100015*
VIII	ANTIHEMOPHILIC FACTOR/VWF (HUMAN) FOR INJ 1000-2400 UNIT	63833061702	85100015*
VIII	ANTIHEMOPHILIC FACTOR/VWF (HUMAN) FOR INJ 250-600 UNIT	53761505	85100010*
VIII	ANTIHEMOPHILIC FACTOR/VWF (HUMAN) FOR INJ 500-1200 UNIT	53761510	85100010*
VIII	ANTIHEMOPHILIC FACTOR/VWF (HUMAN) FOR INJ 500-1000 UNIT	53762010	85100010*
VIII	ANTIHEMOPHILIC FACTOR/VWF (HUMAN) FOR INJ 1000-2000 UNIT	53762020	85100010*
VIII	ANTIHEMOPHILIC FACTOR/VWF (HUMAN) FOR INJ 1000-2400 UNIT	53761520	85100010*
VIII	ANTIHEMOPHILIC FACTOR (HUMAN) FOR INJ 250 IU	53760501	85100010*
VIII	ANTIHEMOPHILIC FACTOR (HUMAN) FOR INJ 500 IU	53760502	85100010*
VIII	ANTIHEMOPHILIC FACTOR (HUMAN) FOR INJ 1000 IU	53760504	85100010*
VIII	ANTIHEMOPHILIC FACTOR (PORCINE) FOR SOLN 400-700 UNIT	55688010602	85100010*
VIII	ANTIHEMOPHILIC FACTOR FOR INJ 250 AHFU	161065020	85100010*
VIII	ANTIHEMOPHILIC FACTOR FOR INJ 250 AHFU	161065030	85100010*
VIII	ANTIHEMOPHILIC FACTOR FOR INJ 250 AHFU	161065050	85100010*
VIII	ANTIHEMOPHILIC FACTOR FOR INJ 250 AHFU	161065060	85100010*
VIII	ANTIHEMOPHILIC FACTOR (HUMAN) FOR INJ 250 UNIT	26066520	85100010*
VIII	ANTIHEMOPHILIC FACTOR (HUMAN) FOR INJ 500 UNIT	26066530	85100010*
VIII	ANTIHEMOPHILIC FACTOR (HUMAN) FOR INJ 1000 UNIT	26066550	85100010*
VIII	ANTIHEMOPHILIC FACTOR (HUMAN) FOR INJ 500 UNIT	13533066530	85100010*
VIII	ANTIHEMOPHILIC FACTOR (HUMAN) FOR INJ 250 UNIT	13533066520	85100010*
VIII	ANTIHEMOPHILIC FACTOR (HUMAN) FOR INJ 1000 UNIT	13533066550	85100010*
VIII	ANTIHEMOPHILIC FACTOR (HUMAN) FOR INJ 1000 UNIT	76125066750	85100010*
VIII	ANTIHEMOPHILIC FACTOR (HUMAN) FOR INJ 250 UNIT	76125025020	85100010*
VIII	ANTIHEMOPHILIC FACTOR (HUMAN) FOR INJ 500 UNIT	76125050030	85100010*
VIII	ANTIHEMOPHILIC FACTOR (HUMAN) FOR INJ 500 UNIT	76125066730	85100010*
VIII	ANTIHEMOPHILIC FACTOR (HUMAN) FOR INJ 250 IU	26066420	85100010*
VIII	ANTIHEMOPHILIC FACTOR (HUMAN) FOR INJ 500 IU	26066430	85100010*
VIII	ANTIHEMOPHILIC FACTOR (HUMAN) FOR INJ 1000 IU	26066450	85100010*
VIII	ANTIHEMOPHILIC FACTOR (HUMAN) FOR INJ 1500 IU	26066460	85100010*
VIII	ANTIHEMOPHILIC FACTOR (HUMAN) FOR INJ 250 IU	192066420	85100010*
VIII	ANTIHEMOPHILIC FACTOR (HUMAN) FOR INJ 500 IU	192066430	85100010*
VIII	ANTIHEMOPHILIC FACTOR (HUMAN) FOR INJ 1000 IU	192066450	85100010*
VIII	ANTIHEMOPHILIC FACTOR (HUMAN) FOR INJ 1500 IU	192066460	85100010*
VIII	ANTIHEMOPHILIC FACTOR (RECOMBINANT) FOR INJ KIT 250 UNIT	26067020	85100010*
VIII	ANTIHEMOPHILIC FACTOR (RECOMBINANT) FOR INJ KIT 500 UNIT	26067030	85100010*
VIII	ANTIHEMOPHILIC FACTOR (RECOMBINANT) FOR INJ KIT 1000 UNIT	26067050	85100010*
VIII	ANTIHEMOPHILIC FACTOR (RECOMBINANT) FOR INJ 250 IU	192067020	85100010*
VIII	ANTIHEMOPHILIC FACTOR (RECOMBINANT) FOR INJ 500 IU	192067030	85100010*
VIII	ANTIHEMOPHILIC FACTOR (RECOMBINANT) FOR INJ 1000 IU	192067050	85100010*
VIII	ANTIHEMOPHILIC FACTOR (RECOMBINANT) FOR INJ 250 IU	161067020	85100010*
VIII	ANTIHEMOPHILIC FACTOR (RECOMBINANT) FOR INJ 500 IU	161067030	85100010*
VIII	ANTIHEMOPHILIC FACTOR (RECOMBINANT) FOR INJ 1000 IU	161067050	85100010*
VIII	ANTIHEMOPHILIC FACTOR (RECOMBINANT) FOR INJ KIT 500 UNIT	26378330	85100010*
VIII	ANTIHEMOPHILIC FACTOR (RECOMBINANT) FOR INJ KIT 1000 UNIT	26378550	85100010*
VIII	ANTIHEMOPHILIC FACTOR (RECOMBINANT) FOR INJ KIT 250 UNIT	26378220	85100010*
VIII	ANTIHEMOPHILIC FACTOR (RECOMBINANT) FOR INJ KIT 250 UNIT	26037220	85100010*
VIII	ANTIHEMOPHILIC FACTOR (RECOMBINANT) FOR INJ KIT 500 UNIT	26037230	85100010*
VIII	ANTIHEMOPHILIC FACTOR (RECOMBINANT) FOR INJ KIT 1000 UNIT	26037250	85100010*
VIII	ANTIHEMOPHILIC FACTOR (RECOMBINANT) FOR INJ KIT 3000 UNIT	26378770	85100010*
VIII	ANTIHEMOPHILIC FACTOR (RECOMBINANT) FOR INJ KIT 2000 UNIT	26378660	85100010*
VIII	ANTIHEMOPHILIC FACTOR (RECOMBINANT) FOR INJ KIT 250 UNIT	26378225	85100010*
VIII	ANTIHEMOPHILIC FACTOR (RECOMBINANT) FOR INJ KIT 2000 UNIT	26378665	85100010*
VIII	ANTIHEMOPHILIC FACTOR (RECOMBINANT) FOR INJ KIT 1000 UNIT	26378555	85100010*
VIII	ANTIHEMOPHILIC FACTOR (RECOMBINANT) FOR INJ KIT 3000 UNIT	26378775	85100010*
VIII	ANTIHEMOPHILIC FACTOR (RECOMBINANT) FOR INJ KIT 500 UNIT	26378335	85100010*
VIII	ANTIHEMOPHILIC FACTOR (RECOMBINANT) FOR INJ KIT 500 UNIT	26379330	85100010*
VIII	ANTIHEMOPHILIC FACTOR (RECOMBINANT) FOR INJ KIT 1000 UNIT	26379550	85100010*
VIII	ANTIHEMOPHILIC FACTOR (RECOMBINANT) FOR INJ KIT 250 UNIT	26379220	85100010*
VIII	ANTIHEMOPHILIC FACTOR (RECOMBINANT) FOR INJ KIT 2000 UNIT	26379660	85100010*
VIII	ANTIHEMOPHILIC FACTOR (RECOMBINANT) FOR INJ KIT 1000 UNIT	26037950	85100010*
VIII	ANTIHEMOPHILIC FACTOR (RECOMBINANT) FOR INJ KIT 500 UNIT	26037930	85100010*
VIII	ANTIHEMOPHILIC FACTOR (RECOMBINANT) FOR INJ KIT 3000 UNIT	26379770	85100010*
VIII	ANTIHEMOPHILIC FACTOR (RECOMBINANT) FOR INJ KIT 250 UNIT	26037920	85100010*
VIII	ANTIHEMOPHILIC FACTOR (HUMAN) FOR INJ 250 IU	13143032154	85100010*
VIII	ANTIHEMOPHILIC FACTOR (HUMAN) FOR INJ 500 IU	13143032155	85100010*
VIII	ANTIHEMOPHILIC FACTOR (HUMAN) FOR INJ 1000 IU	13143032156	85100010*
VIII	ANTIHEMOPHILIC FACTOR (HUMAN) FOR INJ 1701-2000 UNIT	944130401	85100010*
VIII	ANTIHEMOPHILIC FACTOR (HUMAN) FOR INJ 220-400 UNIT	944130101	85100010*
VIII	ANTIHEMOPHILIC FACTOR (HUMAN) FOR INJ 801-1700 UNIT	944130301	85100010*
VIII	ANTIHEMOPHILIC FACTOR (HUMAN) FOR INJ 1701-2000 UNIT	944130410	85100010*
VIII	ANTIHEMOPHILIC FACTOR (HUMAN) FOR INJ 220-400 UNIT	944130110	85100010*
VIII	ANTIHEMOPHILIC FACTOR (HUMAN) FOR INJ 401-800 UNIT	944130210	85100010*
VIII	ANTIHEMOPHILIC FACTOR (HUMAN) FOR INJ 401-800 UNIT	944130201	85100010*
VIII	ANTIHEMOPHILIC FACTOR (HUMAN) FOR INJ 250-1100 UNIT	52769046001	85100010*
VIII	ANTIHEMOPHILIC FACTOR (HUMAN) FOR INJ 801-1700 UNIT	944130310	85100010*
VIII	ANTIHEMOPHILIC FACTOR (HUMAN) FOR INJ KIT 1000 UNIT	53763302	85100010*
VIII	ANTIHEMOPHILIC FACTOR (HUMAN) FOR INJ KIT 1500 UNIT	53763402	85100010*
VIII	ANTIHEMOPHILIC FACTOR (HUMAN) FOR INJ KIT 250 UNIT	53765601	85100010*
VIII	ANTIHEMOPHILIC FACTOR (HUMAN) FOR INJ KIT 500 UNIT	53765602	85100010*
VIII	ANTIHEMOPHILIC FACTOR (HUMAN) FOR INJ KIT 1000 UNIT	53765604	85100010*
VIII	ANTIHEMOPHILIC FACTOR (HUMAN) FOR INJ KIT 1500 UNIT	53765605	85100010*
VIII	ANTIHEMOPHILIC FACTOR (RECOMB PORC) RPFVIII FOR INJ 500 UNIT	944500105	85100010*
VIII	ANTIHEMOPHILIC FACTOR (RECOMB PORC) RPFVIII FOR INJ 500 UNIT	944500101	85100010*
VIII	ANTIHEMOPHILIC FACTOR (RECOMB PORC) RPFVIII FOR INJ 500 UNIT	944500110	85100010*
VIII	ANTIHEMOPHILIC FACTOR (RECOMBINANT) FOR INJ 401-800 UNIT	944284210	85100010*
VIII	ANTIHEMOPHILIC FACTOR (RECOMBINANT) FOR INJ 1801-2400 UNIT	944284510	85100010*
VIII	ANTIHEMOPHILIC FACTOR (RECOMBINANT) FOR INJ 801-1240 UNIT	944284310	85100010*
VIII	ANTIHEMOPHILIC FACTOR (RECOMBINANT) FOR INJ 1241-1800 UNIT	944284410	85100010*
VIII	ANTIHEMOPHILIC FACTOR (RECOMBINANT) FOR INJ 1241-1800 UNIT	944283401	85100010*
VIII	ANTIHEMOPHILIC FACTOR (RECOMBINANT) FOR INJ 1801-2400 UNIT	944283501	85100010*
VIII	ANTIHEMOPHILIC FACTOR (RECOMBINANT) FOR INJ 401-800 UNIT	944283210	85100010*
VIII	ANTIHEMOPHILIC FACTOR (RECOMBINANT) FOR INJ 1241-1800 UNIT	944283410	85100010*
VIII	ANTIHEMOPHILIC FACTOR (RECOMBINANT) FOR INJ 1801-2400 UNIT	944283510	85100010*
VIII	ANTIHEMOPHILIC FACTOR (RECOMBINANT) FOR INJ 220-400 UNIT	944283110	85100010*
VIII	ANTIHEMOPHILIC FACTOR (RECOMBINANT) FOR INJ 801-1240 UNIT	944283310	85100010*
VIII	ANTIHEMOPHILIC FACTOR (RECOMBINANT) FOR INJ 801-1240 UNIT	944293803	85100010*
VIII	ANTIHEMOPHILIC FACTOR (RECOMBINANT) FOR INJ 220-400 UNIT	944284110	85100010*
VIII	ANTIHEMOPHILIC FACTOR (RECOMBINANT) FOR INJ 220-400 UNIT	944293801	85100010*
VIII	ANTIHEMOPHILIC FACTOR (RECOMBINANT) FOR INJ 401-800 UNIT	944293802	85100010*
VIII	ANTIHEMOPHILIC FACTOR (RECOMBINANT) FOR INJ KIT 250 UNIT	58394000704	85100010*
VIII	ANTIHEMOPHILIC FACTOR (RECOMBINANT) FOR INJ KIT 1000 UNIT	58394000504	85100010*
VIII	ANTIHEMOPHILIC FACTOR (RECOMBINANT) FOR INJ KIT 500 UNIT	58394000604	85100010*
VIII	ANTIHEMOPHILIC FACTOR (RECOMBINANT) FOR INJ KIT 2000 UNIT	58394001104	85100010*
VIII	ANTIHEMOPHILIC FACTOR (RECOMBINANT) FOR INJ KIT 250 UNIT	58394000702	85100010*
VIII	ANTIHEMOPHILIC FACTOR (RECOMBINANT) FOR INJ KIT 2000 UNIT	58394001102	85100010*
VIII	ANTIHEMOPHILIC FACTOR (RECOMBINANT) FOR INJ KIT 1000 UNIT	58394000502	85100010*
VIII	ANTIHEMOPHILIC FACTOR (RECOMBINANT) FOR INJ KIT 1000 UNIT	58394000501	85100010*
VIII	ANTIHEMOPHILIC FACTOR (RECOMBINANT) FOR INJ KIT 500 UNIT	58394000601	85100010*
VIII	ANTIHEMOPHILIC FACTOR (RECOMBINANT) FOR INJ KIT 250 UNIT	58394000701	85100010*
VIII	ANTIHEMOPHILIC FACTOR (RECOMBINANT) FOR INJ KIT 2000 UNIT	58394001101	85100010*
VIII	ANTIHEMOPHILIC FACTOR (RECOMBINANT) FOR INJ KIT 500 UNIT	58394000602	85100010*
VIII	FACTOR VIII A-SUBUNIT,RECOMB	169711311	85100010*
VIII	COAGULATION FACTOR VIII A-SUBUNIT FOR INJ 2000-3125 UNIT	169701301	85100010*
VIII	ANTIHEMOPHILIC FACTOR/VWF (HUMAN) FOR INJ 900-900 UNIT	67467018102	85100010*
VIII	ANTIHEMOPHILIC FACTOR/VWF (HUMAN) FOR INJ 450-450 UNIT	67467018101	85100010*
VIII	ANTIHEMOPHILIC FACTOR/VWF (HUMAN) FOR INJ 500-500 UNIT	67467018201	85100010*
VIII	ANTIHEMOPHILIC FACTOR/VWF (HUMAN) FOR INJ 1000-1000 UNIT	67467018202	85100010*
VIII	ANTIHEMOPHILIC FACTOR RECOMBINANT PAF FOR INJ KIT 500 UNIT	58394001301	85100010*
VIII	ANTIHEMOPHILIC FACTOR RECOMBINANT PAF FOR INJ KIT 2000 UNIT	58394001501	85100010*
VIII	ANTIHEMOPHILIC FACTOR RECOMBINANT PAF FOR INJ KIT 1000 UNIT	58394001401	85100010*
VIII	ANTIHEMOPHILIC FACTOR RECOMBINANT PAF FOR INJ KIT 250 UNIT	58394001201	85100010*
VIII	ANTIHEMOPHILIC FACTOR RECOMBINANT PAF FOR INJ KIT 2000 UNIT	58394001502	85100010*
VIII	ANTIHEMOPHILIC FACTOR RECOMBINANT PAF FOR INJ KIT 250 UNIT	58394001202	85100010*
VIII	ANTIHEMOPHILIC FACTOR RECOMBINANT PAF FOR INJ KIT 500 UNIT	58394001302	85100010*
VIII	ANTIHEMOPHILIC FACTOR RECOMBINANT PAF FOR INJ KIT 1000 UNIT	58394001402	85100010*
VIII	ANTIHEMOPHILIC FACTOR RECOMBINANT PAF FOR INJ KIT 3000 UNIT	58394001603	85100010*
VIII	ANTIHEMOPHILIC FACTOR RECOMBINANT PAF FOR INJ KIT 2000 UNIT	58394002503	85100010*
VIII	ANTIHEMOPHILIC FACTOR RECOMBINANT PAF FOR INJ KIT 250 UNIT	58394002203	85100010*
VIII	ANTIHEMOPHILIC FACTOR RECOMBINANT PAF FOR INJ KIT 500 UNIT	58394002303	85100010*
VIII	ANTIHEMOPHILIC FACTOR RECOMBINANT PAF FOR INJ KIT 1000 UNIT	58394002403	85100010*
HCPCS Code	Hemophilia Type	Factor	Derivation
C9134	VIII A-SUBUNIT	Factor VIII	Recombinant
C9136	A	Factor VIII	Recombinant
C9140	A	Factor VIII	Recombinant
J7180	A	Factor VIII	Plasma
J7181	VIII A-SUBUNIT	Factor VIII	Recombinant
J7182	A	Factor VIII	Recombinant
J7185	A	Factor VIII	Recombinant
J7190	A	Factor VIII	Plasma
J7191	A	Factor VIII	Plasma
J7192	A	Factor VIII	Recombinant
J7199	A	Factor VIII	Recombinant
J7205	A	Factor VIII	Recombinant
J7207	A	Factor VIII	Recombinant
J7209	A	Factor VIII	Recombinant
Q2023	A	Factor VIII	Recombinant
Q2041	A	Factor VIII	Plasma
Q4096	A	Factor VIII	Plasma
Q9975	A	Factor VIII	Recombinant
J7189	A	Factor VIIa	Recombinant
J7198	A	Bypassing	Recombinant
Q9995	A	Hemlibra (Factor IXa and X antibody)	Recombinant
Bypassing and Factor VIIa Therapy
Therapy	Derivation	Description	NDC ID	GPI Code
BYPASSING	Plasma	*ANTIINHIBITOR COAGULANT COMPLEX FOR INJ**	64193022502	85100020*
BYPASSING	Plasma	*ANTIINHIBITOR COAGULANT COMPLEX FOR INJ**	64193022402	85100020*
BYPASSING	Plasma	*ANTIINHIBITOR COAGULANT COMPLEX FOR INJ**	64193022302	85100020*
BYPASSING	Plasma	*ANTIINHIBITOR COAGULANT COMPLEX FOR INJ**	64193022204	85100020*
BYPASSING	Plasma	ANTIINHIBITOR COAGULANT COMPLEX FOR INJ	54129022204	85100020*
BYPASSING	Plasma	*ANTIINHIBITOR COAGULANT COMPLEX FOR INJ**	64193022203	85100020*
BYPASSING	Plasma	*ANTIINHIBITOR COAGULANT COMPLEX FOR INJ**	64193022205	85100020*
Factor VIIa	Recombinant	COAGULATION FACTOR VIIA (RECOMB) FOR INJ 1.2 MG (1200 MCG)	169706001	85100026*
Factor VIIa	Recombinant	COAGULATION FACTOR VIIA (RECOMB) FOR INJ 2.4 MG (2400 MCG)	169706101	85100026*
Factor VIIa	Recombinant	COAGULATION FACTOR VIIA (RECOMB) FOR INJ 4.8 MG (4800 MCG)	169706201	85100026*
Factor VIIa	Recombinant	COAGULATION FACTOR VIIA (RECOMB) FOR INJ 5 MG (5000 MCG)	169705001	85100026*
Factor VIIa	Recombinant	COAGULATION FACTOR VIIA (RECOMB) FOR INJ 2 MG (2000 MCG)	169702001	85100026*
Factor VIIa	Recombinant	COAGULATION FACTOR VIIA (RECOMB) FOR INJ 1 MG (1000 MCG)	169701001	85100026*
Factor VIIa	Recombinant	COAGULATION FACTOR VIIA (RECOMB) FOR INJ 8 MG (8000 MCG)	169704001	85100026*
Factor VIIa	Recombinant	COAGULATION FACTOR VIIA (RECOMB) FOR INJ 2 MG (2000 MCG)	169720201	85100026*
Factor VIIa	Recombinant	COAGULATION FACTOR VIIA (RECOMB) FOR INJ 5 MG (5000 MCG)	169720501	85100026*
Factor VIIa	Recombinant	COAGULATION FACTOR VIIA (RECOMB) FOR INJ 1 MG (1000 MCG)	169720101	85100026*
Factor VIIa	Recombinant	COAGULATION FACTOR VIIA (RECOMB) FOR INJ 8 MG (8000 MCG)	169720801	85100026*
Factor IXa and X antibody	Recombinant	30 mg/1 mL (30 mg/mL)	50242092001	85105030202010
Factor IXa and X antibody	Recombinant	60 mg/0.4 mL (150 mg/mL)	50242092101	85105030202020
Factor IXa and X antibody	Recombinant	105 mg/0.7 mL (150 mg/mL)	50242092201	85105030202030
Factor IXa and X antibody	Recombinant	150 mg/1 mL (150 mg/mL)	50242092301	85105030202040
Other Therapies
Therapy	GPI Code	HCPCS Code
Von Willebrand complex therapy	85100015*	C9267, J7188, J7186, J7183, J7184, J7187
Desmopressin	30201010*	J2597

## Sheet: Appendix B
Appendix B. ICD-9/10 and CPT Codes for Hemophilia-related Diagnoses and Events
Code Category	Definition	ICD-9 Diagnosis code	ICD-10 Diagnosis code	CPT code
Hemophilia A		286	D66
Von Willebrand’s disease		286.4	D68.0
Hepatitis C		70.41	B17.10
		70.44	B17.11
		70.51	B18.2
		70.54
Test for clotting factors				85384, 85385, 85610, 85611, 85730, 85732, 85240, 85244, 85245, 85246, 85247, 85335
Acquired coagulation factor deficiency		286.7	D68.4
Other and unspecified defects	Congenital (hereditary) deficiency of other clotting factors	286.3	D68.2
Bleeding event	Effusion of joint site unspecified	719	M25.40
	Effusion of upper arm joint	719.02	M25.429
	Hemarthrosis, site unspecified	719.1	M25.00
	Hemarthrosis, site shoulder region	719.11	M25.019
	Hemarthrosis, site upper arm	719.12	M25.029
	Hemarthrosis, site forearm	719.13	M25.039
	Hemarthrosis, site hand	719.14	M25.049
	Hemarthrosis, site pelvic region and thigh	719.15	M25.059
	Hemarthrosis, site lower leg	719.16	M25.069
	Hemarthrosis, site ankle and foot	719.17	M25.073
	Hemarthrosis, site other specified sites	719.18	M25.08
	Hemarthrosis, multiple sites	719.19	M25.00
	Hemorrhage unspecified	459.0*	R58
	Unspecified intracranial hemorrhage	432.9*	I62.9
	Epistaxis	784.7*	R04.0
	Hemorrhage from throat	784.8*	R04.1
	Hemorrhage of gastrointestinal tract, unspecified	578.9*	K92.2
	Hemorrhage of soft tissue	729.92	M79.81
	Oral hemorrhage	528.9*	K13.70
			K13.79
	Rectal hemorrhage	569.3*	K62.5
	Cerebellar hemorrhage	431.**	I61.xxx
	Subconjunctival hemorrhage	372.72	H11.33
	Hemorrhage of the eyelid	374.81
			H02.89
	Contusion with intact skin surface	920-924.**	S00.10xA
			S00.93xA
			S05.10xA
			S05.90xA
			S10.93xA
			S20.00xA
			S20.20xA
			S20.219A
			S20.229A
			S30.0xxA
			S30.1xxA
			S30.201A
			S30.202A
			S40.019A
			S40.029A
			S50.00xA
			S50.10xA
			S60.00xA
			S60.019A
			S60.10xA
			S60.219A
			S60.229A
			S70.00xA
			S70.10xA
			S80.00xA
			S80.10xA
			S90.00xA
			S90.119A
			S90.129A
			S90.229A
			S90.30xA
			T14.8
			T14.90
Arthropathy	Arthropathy associated with hematological disorders	713.2	M36.2
			M36.3
Arthropathy and related disorders	General	710*-719*	M00.*-M25.*
Osteoarthritis		715.**	M15.*
			M16.*
			M17.*
			M18.*
			M19.*
Difficulty walking		719.7	R26.2
Stiff joints		719.5*	M25.6*
Physical therapy				97001, 97002,
				97010-97039, 97110-97150, 97530, 97161-97164
Pain	Pain in joint site unspecified	719.4	M25.50
	Pain in joint involving shoulder region	719.41	M25.519
	Pain in joint involving upper arm	719.42	M25.529
	Pain in joint involving forearm	719.43	M25.539
	Pain in joint involving hand	719.44	M25.541
	Pain in joint involving pelvic region and thigh	719.45	M25.559
	Pain in joint involving lower leg	719.46	M25.569
	Pain in joint involving ankle and foot	719.47	M25.579
	Pain in joint involving other specified sites	719.48	M25.50
	Pain in joint involving multiple sites	719.49	M25.50
	Pain, not elsewhere classified	338.*	'G89.0'
			'G89.11'
			'G89.12'
			'G89.18'
			'R52'
			'G89.21'
			'G89.22'
			'G89.28'
			'G89.29'
			'G89.3'
			'G89.4'
	Pain in soft tissues of limb	729.5	'M79.609'
	Generalized pain	780.96	'R52'
	Pain in thoracic spine	724.1	'M54.6'
	Lumbago	724.2	'M54.5'
Osteoporosis/Osteopenia*		733.0x, 733.90	M81.0, M81.8, M85.9. M89.9, M94.9

## Sheet: Appendix C
Appendix C. Exclusions
Condition	ICD-9	ICD-10
Congenital factor IX disorder	286.1	D67
Congenital factor X deficiency	286.2	D68.1
Congenital (hereditary) deficiency of other clotting factors	286.3	D68.2
Von Willebrand’s Disease	286.4	D68.0
Hemorrhagic disorder due to intrinsic circulating anticoagulants (e.g., acquired hemophilia, APA with hemorrhagic disorder)	286.5	D68.311
		D68.312
		D68.318
Defibrination syndrome	286.6	D65
Acquired coagulation deficiency	286.7	D68.32
		D68.4
Other and unspecified coagulation defects	286.9	D68.8
		D68.9

## Sheet: Appendix D
Appendix D. LOINC Codes
Code	Code Type	Description	Group
3208-6	LOINC	Coagulation factor VIII activated [Units/​volume] in Platelet poor plasma by Coagulation assay	Factor VIII
3204-5	LOINC	Coagulation factor VIII inhibitor [Units/volume] in Platelet poor plasma by coagulation assay	Inhibitor
3206-0	LOINC	Coagulation factor VIII inhibitor [Presence] in Platelet poor plasma by Coagulation assay	Inhibitor
3209-4	LOINC	Coagulation factor VIII activity actual/​normal in Platelet poor plasma by Coagulation assay	Factor VIII
3210-2	LOINC	Coagulation factor VIII activity [Units/volume] in Platelet poor plasma by Chromogenic method	Factor VIII
3211-0	LOINC	Coagulation factor VIII activity actual/normal in Platelet poor plasma by Coagulation. 2 stage	Factor VIII
3213-6	LOINC	Coagulation factor VIII Ag [Units/​volume] in Platelet poor plasma by Immunoassay	Factor VIII
38521-1	LOINC	Coagulation factor VIII Ag actual/normal in Platelet poor plasma by Immunologic method	Factor VIII
49865-9	LOINC	Coagulation factor VIII activity actual/normal in Platelet poor plasma by Chromogenic method	Factor VIII

## Sheet: Appendix E
Appendix E. ICD-9/10 Procedure and CPT Codes for Joint Procedures and Surgery
Code Category	Definition	ICD-9-PCS code	ICD-10-PCS code	CPT code
Synovectomy	Synovectomy (excision), shoulder	80.71	0RBJ0ZZ	23105
			0RBJ3ZZ	29820
			0RBJ4ZZ	29821
			0RBK0ZZ
			0RBK3ZZ
			0RBK4ZZ
	Synovectomy (excision), elbow	80.72	0RBL0ZZ	24102
			0RBL3ZZ	29835
			0RBL4ZZ	29836
			0RBM0ZZ
			0RBM3ZZ
			0RBM4ZZ
	Synovectomy (excision), wrist	80.73	0RBN0ZZ	25105
			0RBN3ZZ	25118
			0RBN4ZZ	25119
			0RBP0ZZ	29844
			0RBP3ZZ	29845
			0RBP4ZZ
	Synovectomy (excision), hand and finger	80.74	0RBQ0ZZ	26130
			0RBQ3ZZ	26135
			0RBQ4ZZ	26140
			0RBR0ZZ	26145
			0RBR3ZZ
			0RBR4ZZ
			0RBS0ZZ
			0RBS3ZZ
			0RBS4ZZ
			0RBT0ZZ
			0RBT3ZZ
			0RBT4ZZ
			0RBU0ZZ
			0RBU3ZZ
			0RBU4ZZ
			0RBV0ZZ
			0RBV3ZZ
			0RBV4ZZ
			0RBW0ZZ
			0RBW3ZZ
			0RBW4ZZ
			0RBX0ZZ
			0RBX3ZZ
			0RBX4ZZ
	Synovectomy (excision), hip	80.75	0SB90ZZ	27054
			0SB93ZZ	29836
			0SB94ZZ
			0SBB0ZZ
			0SBB3ZZ
			0SBB4ZZ
	Synovectomy (excision), knee	80.76	0SBC0ZZ	27334
			0SBC3ZZ	27335
			0SBC4ZZ	29875
			0SBD0ZZ	29876
			0SBD3ZZ
			0SBD4ZZ
	Synovectomy (excision), ankle	80.77	0SBF0ZZ	27625
			0SBF3ZZ	27626
			0SBF4ZZ	29895
			0SBG0ZZ
			0SBG3ZZ
			0SBG4ZZ
	Synovectomy (excision), foot and toe	80.78	0SBH0ZZ	28070
			0SBH3ZZ	28072
			0SBH4ZZ	28086
			0SBJ0ZZ	28088
			0SBJ3ZZ	28090
			0SBJ4ZZ	28092
			0SBK0ZZ	29905
			0SBK3ZZ
			0SBK4ZZ
			0SBL0ZZ
			0SBL3ZZ
			0SBL4ZZ
			0SBM0ZZ
			0SBM3ZZ
			0SBM4ZZ
			0SBP0ZZ
			0SBP3ZZ
			0SBP4ZZ
			0SBQ0ZZ
			0SBQ3ZZ
			0SBQ4ZZ
Arthrodesis	Ankle fusion	81.11	0SGF04Z	27870
			0SGF05Z	29899
			0SGF07Z
			0SGF0JZ
			0SGF0KZ
			0SGF0ZZ
			0SGF34Z
			0SGF35Z
			0SGF37Z
			0SGF3JZ
			0SGF3KZ
			0SGF3ZZ
			0SGF44Z
			0SGF45Z
			0SGF47Z
			0SGF4JZ
			0SGF4KZ
			0SGF4ZZ
			0SGG04Z
			0SGG05Z
			0SGG07Z
			0SGG0JZ
			0SGG0KZ
			0SGG0ZZ
			0SGG34Z
			0SGG35Z
			0SGG37Z
			0SGG3JZ
			0SGG3KZ
			0SGG3ZZ
			0SGG44Z
			0SGG45Z
			0SGG47Z
			0SGG4JZ
			0SGG4KZ
			0SGG4ZZ
	Triple arthrodesis	81.12	'0SGH04Z'	28715
			'0SGH05Z'
			'0SGH07Z'
			'0SGH0JZ'
			'0SGH0KZ'
			'0SGH0ZZ'
			'0SGH34Z'
			'0SGH35Z'
			'0SGH37Z'
			'0SGH3JZ'
			'0SGH3KZ'
			'0SGH3ZZ'
			'0SGH44Z'
			'0SGH45Z'
			'0SGH47Z'
			'0SGH4JZ'
			'0SGH4KZ'
			'0SGH4ZZ'
			'0SGJ04Z'
			'0SGJ05Z'
			'0SGJ07Z'
			'0SGJ0JZ'
			'0SGJ0KZ'
			'0SGJ0ZZ'
			'0SGJ34Z'
			'0SGJ35Z'
			'0SGJ37Z'
			'0SGJ3JZ'
			'0SGJ3KZ'
			'0SGJ3ZZ'
			'0SGJ44Z'
			'0SGJ45Z'
			'0SGJ47Z'
			'0SGJ4JZ'
			'0SGJ4KZ'
			'0SGJ4ZZ'
	Subtalar fusion	81.13	'0SGH04Z'	28725
			'0SGH05Z'
			'0SGH07Z'
			'0SGH0JZ'
			'0SGH0KZ'
			'0SGH0ZZ'
			'0SGH34Z'
			'0SGH35Z'
			'0SGH37Z'
			'0SGH3JZ'
			'0SGH3KZ'
			'0SGH3ZZ'
			'0SGH44Z'
			'0SGH45Z'
			'0SGH47Z'
			'0SGH4JZ'
			'0SGH4KZ'
			'0SGH4ZZ'
			'0SGJ04Z'
			'0SGJ05Z'
			'0SGJ07Z'
			'0SGJ0JZ'
			'0SGJ0KZ'
			'0SGJ0ZZ'
			'0SGJ34Z'
			'0SGJ35Z'
			'0SGJ37Z'
			'0SGJ3JZ'
			'0SGJ3KZ'
			'0SGJ3ZZ'
			'0SGJ44Z'
			'0SGJ45Z'
			'0SGJ47Z'
			'0SGJ4JZ'
			'0SGJ4KZ'
			'0SGJ4ZZ'
	Midtarsal fusion	81.14	'0SGH04Z'	28730
			'0SGH05Z'	28737
			'0SGH07Z'	28740
			'0SGH0JZ'
			'0SGH0KZ'
			'0SGH0ZZ'
			'0SGH34Z'
			'0SGH35Z'
			'0SGH37Z'
			'0SGH3JZ'
			'0SGH3KZ'
			'0SGH3ZZ'
			'0SGH44Z'
			'0SGH45Z'
			'0SGH47Z'
			'0SGH4JZ'
			'0SGH4KZ'
			'0SGH4ZZ'
			'0SGJ04Z'
			'0SGJ05Z'
			'0SGJ07Z'
			'0SGJ0JZ'
			'0SGJ0KZ'
			'0SGJ0ZZ'
			'0SGJ34Z'
			'0SGJ35Z'
			'0SGJ37Z'
			'0SGJ3JZ'
			'0SGJ3KZ'
			'0SGJ3ZZ'
			'0SGJ44Z'
			'0SGJ45Z'
			'0SGJ47Z'
			'0SGJ4JZ'
			'0SGJ4KZ'
			'0SGJ4ZZ'
	Tarsometatarsal fusion	81.15	'0SGK04Z'	28735
			'0SGK05Z'
			'0SGK07Z'
			'0SGK0JZ'
			'0SGK0KZ'
			'0SGK0ZZ'
			'0SGK34Z'
			'0SGK35Z'
			'0SGK37Z'
			'0SGK3JZ'
			'0SGK3KZ'
			'0SGK3ZZ'
			'0SGK44Z'
			'0SGK45Z'
			'0SGK47Z'
			'0SGK4JZ'
			'0SGK4KZ'
			'0SGK4ZZ'
			'0SGL04Z'
			'0SGL05Z'
			'0SGL07Z'
			'0SGL0JZ'
			'0SGL0KZ'
			'0SGL0ZZ'
			'0SGL34Z'
			'0SGL35Z'
			'0SGL37Z'
			'0SGL3JZ'
			'0SGL3KZ'
			'0SGL3ZZ'
			'0SGL44Z'
			'0SGL45Z'
			'0SGL47Z'
			'0SGL4JZ'
			'0SGL4KZ'
			'0SGL4ZZ'
	Metatarsophalangeal fusion	81.16	'0SGM04Z'	28750
			'0SGM05Z'
			'0SGM07Z'
			'0SGM0JZ'
			'0SGM0KZ'
			'0SGM0ZZ'
			'0SGM34Z'
			'0SGM35Z'
			'0SGM37Z'
			'0SGM3JZ'
			'0SGM3KZ'
			'0SGM3ZZ'
			'0SGM44Z'
			'0SGM45Z'
			'0SGM47Z'
			'0SGM4JZ'
			'0SGM4KZ'
			'0SGM4ZZ'
			'0SGN04Z'
			'0SGN05Z'
			'0SGN07Z'
			'0SGN0JZ'
			'0SGN0KZ'
			'0SGN0ZZ'
			'0SGN34Z'
			'0SGN35Z'
			'0SGN37Z'
			'0SGN3JZ'
			'0SGN3KZ'
			'0SGN3ZZ'
			'0SGN44Z'
			'0SGN45Z'
			'0SGN47Z'
			'0SGN4JZ'
			'0SGN4KZ'
			'0SGN4ZZ'
	Other fusion of foot	81.17	'0SGH04Z'	28705
			'0SGH05Z'	28755
			'0SGH07Z'	28760
			'0SGH0JZ'
			'0SGH0KZ'
			'0SGH0ZZ'
			'0SGH34Z'
			'0SGH35Z'
			'0SGH37Z'
			'0SGH3JZ'
			'0SGH3KZ'
			'0SGH3ZZ'
			'0SGH44Z'
			'0SGH45Z'
			'0SGH47Z'
			'0SGH4JZ'
			'0SGH4KZ'
			'0SGH4ZZ'
			'0SGJ04Z'
			'0SGJ05Z'
			'0SGJ07Z'
			'0SGJ0JZ'
			'0SGJ0KZ'
			'0SGJ0ZZ'
			'0SGJ34Z'
			'0SGJ35Z'
			'0SGJ37Z'
			'0SGJ3JZ'
			'0SGJ3KZ'
			'0SGJ3ZZ'
			'0SGJ44Z'
			'0SGJ45Z'
			'0SGJ47Z'
			'0SGJ4JZ'
			'0SGJ4KZ'
			'0SGJ4ZZ'
	Subtalar joint arthroereisis	81.18	'0SUH0JZ'	29907
			'0SUH3JZ'
			'0SUH4JZ'
			'0SUJ0JZ'
			'0SUJ3JZ'
			'0SUJ4JZ'
	Arthrodesis of hip	81.21	'0SG904Z'	27284
			'0SG905Z'	27286
			'0SG907Z'
			'0SG90JZ'
			'0SG90KZ'
			'0SG90ZZ'
			'0SG934Z'
			'0SG935Z'
			'0SG937Z'
			'0SG93JZ'
			'0SG93KZ'
			'0SG93ZZ'
			'0SG944Z'
			'0SG945Z'
			'0SG947Z'
			'0SG94JZ'
			'0SG94KZ'
			'0SG94ZZ'
			'0SGB04Z'
			'0SGB05Z'
			'0SGB07Z'
			'0SGB0JZ'
			'0SGB0KZ'
			'0SGB0ZZ'
			'0SGB34Z'
			'0SGB35Z'
			'0SGB37Z'
			'0SGB3JZ'
			'0SGB3KZ'
			'0SGB3ZZ'
			'0SGB44Z'
			'0SGB45Z'
			'0SGB47Z'
			'0SGB4JZ'
			'0SGB4KZ'
			'0SGB4ZZ'
	Arthrodesis of knee	81.22	'0SGC04Z'	27580
			'0SGC05Z'
			'0SGC07Z'
			'0SGC0JZ'
			'0SGC0KZ'
			'0SGC0ZZ'
			'0SGC34Z'
			'0SGC35Z'
			'0SGC37Z'
			'0SGC3JZ'
			'0SGC3KZ'
			'0SGC3ZZ'
			'0SGC44Z'
			'0SGC45Z'
			'0SGC47Z'
			'0SGC4JZ'
			'0SGC4KZ'
			'0SGC4ZZ'
			'0SGD04Z'
			'0SGD05Z'
			'0SGD07Z'
			'0SGD0JZ'
			'0SGD0KZ'
			'0SGD0ZZ'
			'0SGD34Z'
			'0SGD35Z'
			'0SGD37Z'
			'0SGD3JZ'
			'0SGD3KZ'
			'0SGD3ZZ'
			'0SGD44Z'
			'0SGD45Z'
			'0SGD47Z'
			'0SGD4JZ'
			'0SGD4KZ'
			'0SGD4ZZ'
	Arthrodesis of shoulder	81.23	'0RGJ04Z'	23800
			'0RGJ07Z'	23802
			'0RGJ0JZ'
			'0RGJ0KZ'
			'0RGJ0ZZ'
			'0RGJ34Z'
			'0RGJ37Z'
			'0RGJ3JZ'
			'0RGJ3KZ'
			'0RGJ3ZZ'
			'0RGJ44Z'
			'0RGJ47Z'
			'0RGJ4JZ'
			'0RGJ4KZ'
			'0RGJ4ZZ'
			'0RGK04Z'
			'0RGK07Z'
			'0RGK0JZ'
			'0RGK0KZ'
			'0RGK0ZZ'
			'0RGK34Z'
			'0RGK37Z'
			'0RGK3JZ'
			'0RGK3KZ'
			'0RGK3ZZ'
			'0RGK44Z'
			'0RGK47Z'
			'0RGK4JZ'
			'0RGK4KZ'
			'0RGK4ZZ'
	Arthrodesis of elbow	81.24	'0RGL04Z'	24800
			'0RGL05Z'	24802
			'0RGL07Z'
			'0RGL0JZ'
			'0RGL0KZ'
			'0RGL0ZZ'
			'0RGL34Z'
			'0RGL35Z'
			'0RGL37Z'
			'0RGL3JZ'
			'0RGL3KZ'
			'0RGL3ZZ'
			'0RGL44Z'
			'0RGL45Z'
			'0RGL47Z'
			'0RGL4JZ'
			'0RGL4KZ'
			'0RGL4ZZ'
			'0RGM04Z'
			'0RGM05Z'
			'0RGM07Z'
			'0RGM0JZ'
			'0RGM0KZ'
			'0RGM0ZZ'
			'0RGM34Z'
			'0RGM35Z'
			'0RGM37Z'
			'0RGM3JZ'
			'0RGM3KZ'
			'0RGM3ZZ'
			'0RGM44Z'
			'0RGM45Z'
			'0RGM47Z'
			'0RGM4JZ'
			'0RGM4KZ'
			'0RGM4ZZ'
	Carporadial fusion	81.25	'0RGN04Z'	25800
			'0RGN05Z'	25805
			'0RGN07Z'	25810
			'0RGN0JZ'	25815
			'0RGN0KZ'	25820
			'0RGN0ZZ'	25830
			'0RGN34Z'
			'0RGN35Z'
			'0RGN37Z'
			'0RGN3JZ'
			'0RGN3KZ'
			'0RGN3ZZ'
			'0RGN44Z'
			'0RGN45Z'
			'0RGN47Z'
			'0RGN4JZ'
			'0RGN4KZ'
			'0RGN4ZZ'
			'0RGP04Z'
			'0RGP05Z'
			'0RGP07Z'
			'0RGP0JZ'
			'0RGP0KZ'
			'0RGP0ZZ'
			'0RGP34Z'
			'0RGP35Z'
			'0RGP37Z'
			'0RGP3JZ'
			'0RGP3KZ'
			'0RGP3ZZ'
			'0RGP44Z'
			'0RGP45Z'
			'0RGP47Z'
			'0RGP4JZ'
			'0RGP4KZ'
			'0RGP4ZZ'
	Metacarpocarpal fusion	81.26	'0RGQ04Z'	26841
			'0RGQ05Z'	26842
			'0RGQ07Z'	26843
			'0RGQ0JZ'	26844
			'0RGQ0KZ'
			'0RGQ0ZZ'
			'0RGQ34Z'
			'0RGQ35Z'
			'0RGQ37Z'
			'0RGQ3JZ'
			'0RGQ3KZ'
			'0RGQ3ZZ'
			'0RGQ44Z'
			'0RGQ45Z'
			'0RGQ47Z'
			'0RGQ4JZ'
			'0RGQ4KZ'
			'0RGQ4ZZ'
			'0RGR04Z'
			'0RGR05Z'
			'0RGR07Z'
			'0RGR0JZ'
			'0RGR0KZ'
			'0RGR0ZZ'
			'0RGR34Z'
			'0RGR35Z'
			'0RGR37Z'
			'0RGR3JZ'
			'0RGR3KZ'
			'0RGR3ZZ'
			'0RGR44Z'
			'0RGR45Z'
			'0RGR47Z'
			'0RGR4JZ'
			'0RGR4KZ'
			'0RGR4ZZ'
			'0RGS04Z'
			'0RGS05Z'
			'0RGS07Z'
			'0RGS0JZ'
			'0RGS0KZ'
			'0RGS0ZZ'
			'0RGS34Z'
			'0RGS35Z'
			'0RGS37Z'
			'0RGS3JZ'
			'0RGS3KZ'
			'0RGS3ZZ'
			'0RGS44Z'
			'0RGS45Z'
			'0RGS47Z'
			'0RGS4JZ'
			'0RGS4KZ'
			'0RGS4ZZ'
			'0RGT04Z'
			'0RGT05Z'
			'0RGT07Z'
			'0RGT0JZ'
			'0RGT0KZ'
			'0RGT0ZZ'
			'0RGT34Z'
			'0RGT35Z'
			'0RGT37Z'
			'0RGT3JZ'
			'0RGT3KZ'
			'0RGT3ZZ'
			'0RGT44Z'
			'0RGT45Z'
			'0RGT47Z'
			'0RGT4JZ'
			'0RGT4KZ'
			'0RGT4ZZ'
	Metacarpophalangeal fusion	81.27	'0RGU04Z'	26850
			'0RGU05Z'	26852
			'0RGU07Z'
			'0RGU0JZ'
			'0RGU0KZ'
			'0RGU0ZZ'
			'0RGU34Z'
			'0RGU35Z'
			'0RGU37Z'
			'0RGU3JZ'
			'0RGU3KZ'
			'0RGU3ZZ'
			'0RGU44Z'
			'0RGU45Z'
			'0RGU47Z'
			'0RGU4JZ'
			'0RGU4KZ'
			'0RGU4ZZ'
			'0RGV04Z'
			'0RGV05Z'
			'0RGV07Z'
			'0RGV0JZ'
			'0RGV0KZ'
			'0RGV0ZZ'
			'0RGV34Z'
			'0RGV35Z'
			'0RGV37Z'
			'0RGV3JZ'
			'0RGV3KZ'
			'0RGV3ZZ'
			'0RGV44Z'
			'0RGV45Z'
			'0RGV47Z'
			'0RGV4JZ'
			'0RGV4KZ'
			'0RGV4ZZ'
	Interphalangeal fusion	81.28	'0RGW04Z'	26861
			'0RGW05Z'	26862
			'0RGW07Z'	26863
			'0RGW0JZ'
			'0RGW0KZ'
			'0RGW0ZZ'
			'0RGW34Z'
			'0RGW35Z'
			'0RGW37Z'
			'0RGW3JZ'
			'0RGW3KZ'
			'0RGW3ZZ'
			'0RGW44Z'
			'0RGW45Z'
			'0RGW47Z'
			'0RGW4JZ'
			'0RGW4KZ'
			'0RGW4ZZ'
			'0RGX04Z'
			'0RGX05Z'
			'0RGX07Z'
			'0RGX0JZ'
			'0RGX0KZ'
			'0RGX0ZZ'
			'0RGX34Z'
			'0RGX35Z'
			'0RGX37Z'
			'0RGX3JZ'
			'0RGX3KZ'
			'0RGX3ZZ'
			'0RGX44Z'
			'0RGX45Z'
			'0RGX47Z'
			'0RGX4JZ'
			'0RGX4KZ'
			'0RGX4ZZ'
Osteotomy
	WEDGE OSTEOTOMY OF SCAPULA, CLAVICLE, AND THORAX (RIBS AND STERNUM)	77.21	'0P800ZZ'	23480
			'0P803ZZ'	23485
			'0P804ZZ'
			'0P810ZZ'
			'0P813ZZ'
			'0P814ZZ'
			'0P820ZZ'
			'0P823ZZ'
			'0P824ZZ'
			'0P850ZZ'
			'0P853ZZ'
			'0P854ZZ'
			'0P860ZZ'
			'0P863ZZ'
			'0P864ZZ'
			'0P890ZZ'
			'0P893ZZ'
			'0P894ZZ'
			'0P8B0ZZ'
			'0P8B3ZZ'
			'0P8B4ZZ'
	WEDGE OSTEOTOMY OF HUMERUS	77.22	'0P8C0ZZ'	24400
			'0P8C3ZZ'
			'0P8C4ZZ'
			'0P8D0ZZ'
			'0P8D3ZZ'
			'0P8D4ZZ'
			'0P8F0ZZ'
			'0P8F3ZZ'
			'0P8F4ZZ'
			'0P8G0ZZ'
			'0P8G3ZZ'
			'0P8G4ZZ'
	WEDGE OSTEOTOMY OF RADIUS AND ULNA	77.23	'0P8H0ZZ'	25350
			'0P8H3ZZ'	25355
			'0P8H4ZZ'	25360
			'0P8J0ZZ'	25365
			'0P8J3ZZ'
			'0P8J4ZZ'
			'0P8K0ZZ'
			'0P8K3ZZ'
			'0P8K4ZZ'
			'0P8L0ZZ'
			'0P8L3ZZ'
			'0P8L4ZZ'
	WEDGE OSTEOTOMY OF CARPALS AND METACARPALS	77.24	'0P8M0ZZ'	26565
			'0P8M3ZZ'	26567
			'0P8M4ZZ'	26568
			'0P8N0ZZ'
			'0P8N3ZZ'
			'0P8N4ZZ'
			'0P8P0ZZ'
			'0P8P3ZZ'
			'0P8P4ZZ'
			'0P8Q0ZZ'
			'0P8Q3ZZ'
			'0P8Q4ZZ'
	WEDGE OSTEOTOMY OF FEMUR	77.25	'0Q860ZZ'	27140
			'0Q863ZZ'	27146
			'0Q864ZZ'	27147
			'0Q870ZZ'	27151
			'0Q873ZZ'	27156
			'0Q874ZZ'	27158
			'0Q880ZZ'	27161
			'0Q883ZZ'	27165
			'0Q884ZZ'	27181
			'0Q890ZZ'	27286
			'0Q893ZZ'	27448
			'0Q894ZZ'	27450
			'0Q8B0ZZ'	27454
			'0Q8B3ZZ'
			'0Q8B4ZZ'
			'0Q8C0ZZ'
			'0Q8C3ZZ'
			'0Q8C4ZZ'
	WEDGE OSTEOTOMY OF PATELLA	77.26	'0Q8D0ZZ'	27455
			'0Q8D3ZZ'	27457
			'0Q8D4ZZ'
			'0Q8F0ZZ'
			'0Q8F3ZZ'
			'0Q8F4ZZ'
	WEDGE OSTEOTOMY OF TIBIA AND FIBULA	77.27	'0Q8G0ZZ'	27676
			'0Q8G3ZZ'	27705
			'0Q8G4ZZ'	27707
			'0Q8H0ZZ'	27709
			'0Q8H3ZZ'	27712
			'0Q8H4ZZ'
			'0Q8J0ZZ'
			'0Q8J3ZZ'
			'0Q8J4ZZ'
			'0Q8K0ZZ'
			'0Q8K3ZZ'
			'0Q8K4ZZ'
	WEDGE OSTEOTOMY OF TARSALS AND METATARSALS	77.28	'0Q8L0ZZ'	28296
			'0Q8L3ZZ'	28298
			'0Q8L4ZZ'	28299
			'0Q8M0ZZ'	28300
			'0Q8M3ZZ'	28302
			'0Q8M4ZZ'	28304
			'0Q8N0ZZ'	28305
			'0Q8N3ZZ'	28306
			'0Q8N4ZZ'	28307
			'0Q8P0ZZ'	28308
			'0Q8P3ZZ'	28309
			'0Q8P4ZZ'	28310
				28312
				28735
	WEDGE OSTEOTOMY OF OTHER BONE, EXCEPT FACIAL BONES	77.29	'0P830ZZ'
			'0P833ZZ'
			'0P834ZZ'
			'0P840ZZ'
			'0P843ZZ'
			'0P844ZZ'
			'0P8T0ZZ'
			'0P8T3ZZ'
			'0P8T4ZZ'
			'0P8V0ZZ'
			'0P8V3ZZ'
			'0P8V4ZZ'
			'0Q800ZZ'
			'0Q803ZZ'
			'0Q804ZZ'
			'0Q820ZZ'
			'0Q823ZZ'
			'0Q824ZZ'
			'0Q830ZZ'
			'0Q833ZZ'
			'0Q834ZZ'
			'0Q8Q0ZZ'
			'0Q8Q3ZZ'
			'0Q8Q4ZZ'
			'0Q8R0ZZ'
			'0Q8R3ZZ'
			'0Q8R4ZZ'
	OTHER LOCAL EXCISION OR DESTRUCTION OF LESION OF JOINT, UNSPECIFIED SITE	80.8	'0M500ZZ'
			'0M503ZZ'
			'0M504ZZ'
			'0M510ZZ'
			'0M513ZZ'
			'0M514ZZ'
			'0M520ZZ'
			'0M523ZZ'
			'0M524ZZ'
			'0M530ZZ'
			'0M533ZZ'
			'0M534ZZ'
			'0M540ZZ'
			'0M543ZZ'
			'0M544ZZ'
			'0M550ZZ'
			'0M553ZZ'
			'0M554ZZ'
			'0M560ZZ'
			'0M563ZZ'
			'0M564ZZ'
			'0M570ZZ'
			'0M573ZZ'
			'0M574ZZ'
			'0M580ZZ'
			'0M583ZZ'
			'0M584ZZ'
			'0M590ZZ'
			'0M593ZZ'
			'0M594ZZ'
			'0M5B0ZZ'
			'0M5B3ZZ'
			'0M5B4ZZ'
			'0M5C0ZZ'
			'0M5C3ZZ'
			'0M5C4ZZ'
			'0M5D0ZZ'
			'0M5D3ZZ'
			'0M5D4ZZ'
			'0M5F0ZZ'
			'0M5F3ZZ'
			'0M5F4ZZ'
			'0M5G0ZZ'
			'0M5G3ZZ'
			'0M5G4ZZ'
			'0M5L0ZZ'
			'0M5L3ZZ'
			'0M5L4ZZ'
			'0M5M0ZZ'
			'0M5M3ZZ'
			'0M5M4ZZ'
			'0M5N0ZZ'
			'0M5N3ZZ'
			'0M5N4ZZ'
			'0M5P0ZZ'
			'0M5P3ZZ'
			'0M5P4ZZ'
			'0M5Q0ZZ'
			'0M5Q3ZZ'
			'0M5Q4ZZ'
			'0M5R0ZZ'
			'0M5R3ZZ'
			'0M5R4ZZ'
			'0M5S0ZZ'
			'0M5S3ZZ'
			'0M5S4ZZ'
			'0M5T0ZZ'
			'0M5T3ZZ'
			'0M5T4ZZ'
			'0M5V0ZZ'
			'0M5V3ZZ'
			'0M5V4ZZ'
			'0M5W0ZZ'
			'0M5W3ZZ'
			'0M5W4ZZ'
			'0R500ZZ'
			'0R503ZZ'
			'0R504ZZ'
			'0R510ZZ'
			'0R513ZZ'
			'0R514ZZ'
			'0R540ZZ'
			'0R543ZZ'
			'0R544ZZ'
			'0R560ZZ'
			'0R563ZZ'
			'0R564ZZ'
			'0R5A0ZZ'
			'0R5A3ZZ'
			'0R5A4ZZ'
			'0R5C0ZZ'
			'0R5C3ZZ'
			'0R5C4ZZ'
			'0R5D0ZZ'
			'0R5D3ZZ'
			'0R5D4ZZ'
			'0R5J0ZZ'
			'0R5J3ZZ'
			'0R5J4ZZ'
			'0R5K0ZZ'
			'0R5K3ZZ'
			'0R5K4ZZ'
			'0R5L0ZZ'
			'0R5L3ZZ'
			'0R5L4ZZ'
			'0R5M0ZZ'
			'0R5M3ZZ'
			'0R5M4ZZ'
			'0R5N0ZZ'
			'0R5N3ZZ'
			'0R5N4ZZ'
			'0R5P0ZZ'
			'0R5P3ZZ'
			'0R5P4ZZ'
			'0R5Q0ZZ'
			'0R5Q3ZZ'
			'0R5Q4ZZ'
			'0R5R0ZZ'
			'0R5R3ZZ'
			'0R5R4ZZ'
			'0R5S0ZZ'
			'0R5S3ZZ'
			'0R5S4ZZ'
			'0R5T0ZZ'
			'0R5T3ZZ'
			'0R5T4ZZ'
			'0R5U0ZZ'
			'0R5U3ZZ'
			'0R5U4ZZ'
			'0R5V0ZZ'
			'0R5V3ZZ'
			'0R5V4ZZ'
			'0R5W0ZZ'
			'0R5W3ZZ'
			'0R5W4ZZ'
			'0R5X0ZZ'
			'0R5X3ZZ'
			'0R5X4ZZ'
			'0RB00ZZ'
			'0RB03ZZ'
			'0RB04ZZ'
			'0RB10ZZ'
			'0RB13ZZ'
			'0RB14ZZ'
			'0RB30ZZ'
			'0RB33ZZ'
			'0RB34ZZ'
			'0RB40ZZ'
			'0RB43ZZ'
			'0RB44ZZ'
			'0RB50ZZ'
			'0RB53ZZ'
			'0RB54ZZ'
			'0RB60ZZ'
			'0RB63ZZ'
			'0RB64ZZ'
			'0RB90ZZ'
			'0RB93ZZ'
			'0RB94ZZ'
			'0RBA0ZZ'
			'0RBA3ZZ'
			'0RBA4ZZ'
			'0RBB0ZZ'
			'0RBB3ZZ'
			'0RBB4ZZ'
			'0RBC0ZZ'
			'0RBC3ZZ'
			'0RBC4ZZ'
			'0RBD0ZZ'
			'0RBD3ZZ'
			'0RBD4ZZ'
			'0RBE0ZZ'
			'0RBE3ZZ'
			'0RBE4ZZ'
			'0RBF0ZZ'
			'0RBF3ZZ'
			'0RBF4ZZ'
			'0RBG0ZZ'
			'0RBG3ZZ'
			'0RBG4ZZ'
			'0RBH0ZZ'
			'0RBH3ZZ'
			'0RBH4ZZ'
			'0RBJ0ZZ'
			'0RBJ3ZZ'
			'0RBJ4ZZ'
			'0RBK0ZZ'
			'0RBK3ZZ'
			'0RBK4ZZ'
			'0RBL0ZZ'
			'0RBL3ZZ'
			'0RBL4ZZ'
			'0RBM0ZZ'
			'0RBM3ZZ'
			'0RBM4ZZ'
			'0RBN0ZZ'
			'0RBN3ZZ'
			'0RBN4ZZ'
			'0RBP0ZZ'
			'0RBP3ZZ'
			'0RBP4ZZ'
			'0RBQ0ZZ'
			'0RBQ3ZZ'
			'0RBQ4ZZ'
			'0RBR0ZZ'
			'0RBR3ZZ'
			'0RBR4ZZ'
			'0RBS0ZZ'
			'0RBS3ZZ'
			'0RBS4ZZ'
			'0RBT0ZZ'
			'0RBT3ZZ'
			'0RBT4ZZ'
			'0RBU0ZZ'
			'0RBU3ZZ'
			'0RBU4ZZ'
			'0RBV0ZZ'
			'0RBV3ZZ'
			'0RBV4ZZ'
			'0RBW0ZZ'
			'0RBW3ZZ'
			'0RBW4ZZ'
			'0RBX0ZZ'
			'0RBX3ZZ'
			'0RBX4ZZ'
			'0S500ZZ'
			'0S503ZZ'
			'0S504ZZ'
			'0S520ZZ'
			'0S523ZZ'
			'0S524ZZ'
			'0S530ZZ'
			'0S533ZZ'
			'0S534ZZ'
			'0S540ZZ'
			'0S543ZZ'
			'0S544ZZ'
			'0S550ZZ'
			'0S553ZZ'
			'0S554ZZ'
			'0S560ZZ'
			'0S563ZZ'
			'0S564ZZ'
			'0S570ZZ'
			'0S573ZZ'
			'0S574ZZ'
			'0S580ZZ'
			'0S583ZZ'
			'0S584ZZ'
			'0S590ZZ'
			'0S593ZZ'
			'0S594ZZ'
			'0S5B0ZZ'
			'0S5B3ZZ'
			'0S5B4ZZ'
			'0S5C0ZZ'
			'0S5C3ZZ'
			'0S5C4ZZ'
			'0S5D0ZZ'
			'0S5D3ZZ'
			'0S5D4ZZ'
			'0S5F0ZZ'
			'0S5F3ZZ'
			'0S5F4ZZ'
			'0S5G0ZZ'
			'0S5G3ZZ'
			'0S5G4ZZ'
			'0S5K0ZZ'
			'0S5K3ZZ'
			'0S5K4ZZ'
			'0S5L0ZZ'
			'0S5L3ZZ'
			'0S5L4ZZ'
			'0S5M0ZZ'
			'0S5M3ZZ'
			'0S5M4ZZ'
			'0S5N0ZZ'
			'0S5N3ZZ'
			'0S5N4ZZ'
			'0S5P0ZZ'
			'0S5P3ZZ'
			'0S5P4ZZ'
			'0S5Q0ZZ'
			'0S5Q3ZZ'
			'0S5Q4ZZ'
			'0SB00ZZ'
			'0SB03ZZ'
			'0SB04ZZ'
			'0SB20ZZ'
			'0SB23ZZ'
			'0SB24ZZ'
			'0SB30ZZ'
			'0SB33ZZ'
			'0SB34ZZ'
			'0SB40ZZ'
			'0SB43ZZ'
			'0SB44ZZ'
			'0SB50ZZ'
			'0SB53ZZ'
			'0SB54ZZ'
			'0SB60ZZ'
			'0SB63ZZ'
			'0SB64ZZ'
			'0SB70ZZ'
			'0SB73ZZ'
			'0SB74ZZ'
			'0SB80ZZ'
			'0SB83ZZ'
			'0SB84ZZ'
			'0SB90ZZ'
			'0SB93ZZ'
			'0SB94ZZ'
			'0SBB0ZZ'
			'0SBB3ZZ'
			'0SBB4ZZ'
			'0SBC0ZZ'
			'0SBC3ZZ'
			'0SBC4ZZ'
			'0SBD0ZZ'
			'0SBD3ZZ'
			'0SBD4ZZ'
			'0SBF0ZZ'
			'0SBF3ZZ'
			'0SBF4ZZ'
			'0SBG0ZZ'
			'0SBG3ZZ'
			'0SBG4ZZ'
			'0SBK0ZZ'
			'0SBK3ZZ'
			'0SBK4ZZ'
			'0SBL0ZZ'
			'0SBL3ZZ'
			'0SBL4ZZ'
			'0SBM0ZZ'
			'0SBM3ZZ'
			'0SBM4ZZ'
			'0SBN0ZZ'
			'0SBN3ZZ'
			'0SBN4ZZ'
			'0SBP0ZZ'
			'0SBP3ZZ'
			'0SBP4ZZ'
			'0SBQ0ZZ'
			'0SBQ3ZZ'
			'0SBQ4ZZ'
(Excision of joint)
	OTHER LOCAL EXCISION OR DESTRUCTION OF LESION OF SHOULDER JOINT	80.81	'0M510ZZ'
			'0M513ZZ'
			'0M514ZZ'
			'0M520ZZ'
			'0M523ZZ'
			'0M524ZZ'
			'0MB10ZZ'
			'0MB13ZZ'
			'0MB14ZZ'
			'0MB20ZZ'
			'0MB23ZZ'
			'0MB24ZZ'
			'0R5J0ZZ'
			'0R5J3ZZ'
			'0R5J4ZZ'
			'0R5K0ZZ'
			'0R5K3ZZ'
			'0R5K4ZZ'
			'0RBJ0ZZ'
			'0RBJ3ZZ'
			'0RBJ4ZZ'
			'0RBK0ZZ'
			'0RBK3ZZ'
			'0RBK4ZZ'
	OTHER LOCAL EXCISION OR DESTRUCTION OF LESION OF ELBOW JOINT	80.82	'0M530ZZ'
			'0M533ZZ'
			'0M534ZZ'
			'0M540ZZ'
			'0M543ZZ'
			'0M544ZZ'
			'0MB30ZZ'
			'0MB33ZZ'
			'0MB34ZZ'
			'0MB40ZZ'
			'0MB43ZZ'
			'0MB44ZZ'
			'0R5L0ZZ'
			'0R5L3ZZ'
			'0R5L4ZZ'
			'0R5M0ZZ'
			'0R5M3ZZ'
			'0R5M4ZZ'
			'0RBL0ZZ'
			'0RBL3ZZ'
			'0RBL4ZZ'
			'0RBM0ZZ'
			'0RBM3ZZ'
			'0RBM4ZZ'
	OTHER LOCAL EXCISION OR DESTRUCTION OF LESION OF WRIST JOINT	80.83	'0M550ZZ'
			'0M553ZZ'
			'0M554ZZ'
			'0M560ZZ'
			'0M563ZZ'
			'0M564ZZ'
			'0MB50ZZ'
			'0MB53ZZ'
			'0MB54ZZ'
			'0MB60ZZ'
			'0MB63ZZ'
			'0MB64ZZ'
			'0R5N0ZZ'
			'0R5N3ZZ'
			'0R5N4ZZ'
			'0R5P0ZZ'
			'0R5P3ZZ'
			'0R5P4ZZ'
			'0RBN0ZZ'
			'0RBN3ZZ'
			'0RBN4ZZ'
			'0RBP0ZZ'
			'0RBP3ZZ'
			'0RBP4ZZ'
	OTHER LOCAL EXCISION OR DESTRUCTION OF LESION OF JOINT OF HAND AND FINGER	80.84	'0M570ZZ'
			'0M573ZZ'
			'0M574ZZ'
			'0M580ZZ'
			'0M583ZZ'
			'0M584ZZ'
			'0MB70ZZ'
			'0MB73ZZ'
			'0MB74ZZ'
			'0MB80ZZ'
			'0MB83ZZ'
			'0MB84ZZ'
			'0R5Q0ZZ'
			'0R5Q3ZZ'
			'0R5Q4ZZ'
			'0R5R0ZZ'
			'0R5R3ZZ'
			'0R5R4ZZ'
			'0R5S0ZZ'
			'0R5S3ZZ'
			'0R5S4ZZ'
			'0R5T0ZZ'
			'0R5T3ZZ'
			'0R5T4ZZ'
			'0R5U0ZZ'
			'0R5U3ZZ'
			'0R5U4ZZ'
			'0R5V0ZZ'
			'0R5V3ZZ'
			'0R5V4ZZ'
			'0R5W0ZZ'
			'0R5W3ZZ'
			'0R5W4ZZ'
			'0R5X0ZZ'
			'0R5X3ZZ'
			'0R5X4ZZ'
			'0RBQ0ZZ'
			'0RBQ3ZZ'
			'0RBQ4ZZ'
			'0RBR0ZZ'
			'0RBR3ZZ'
			'0RBR4ZZ'
			'0RBS0ZZ'
			'0RBS3ZZ'
			'0RBS4ZZ'
			'0RBT0ZZ'
			'0RBT3ZZ'
			'0RBT4ZZ'
			'0RBU0ZZ'
			'0RBU3ZZ'
			'0RBU4ZZ'
			'0RBV0ZZ'
			'0RBV3ZZ'
			'0RBV4ZZ'
			'0RBW0ZZ'
			'0RBW3ZZ'
			'0RBW4ZZ'
			'0RBX0ZZ'
			'0RBX3ZZ'
			'0RBX4ZZ'
	OTHER LOCAL EXCISION OR DESTRUCTION OF LESION OF HIP JOINT	80.85	'0M5L0ZZ'
			'0M5L3ZZ'
			'0M5L4ZZ'
			'0M5M0ZZ'
			'0M5M3ZZ'
			'0M5M4ZZ'
			'0MBL0ZZ'
			'0MBL3ZZ'
			'0MBL4ZZ'
			'0MBM0ZZ'
			'0MBM3ZZ'
			'0MBM4ZZ'
			'0S590ZZ'
			'0S593ZZ'
			'0S594ZZ'
			'0S5B0ZZ'
			'0S5B3ZZ'
			'0S5B4ZZ'
			'0SB90ZZ'
			'0SB93ZZ'
			'0SB94ZZ'
			'0SBB0ZZ'
			'0SBB3ZZ'
			'0SBB4ZZ'
	OTHER LOCAL EXCISION OR DESTRUCTION OF LESION OF KNEE JOINT	80.86	'0M5N0ZZ'
			'0M5N3ZZ'
			'0M5N4ZZ'
			'0M5P0ZZ'
			'0M5P3ZZ'
			'0M5P4ZZ'
			'0MBN0ZZ'
			'0MBN3ZZ'
			'0MBN4ZZ'
			'0MBP0ZZ'
			'0MBP3ZZ'
			'0MBP4ZZ'
			'0S5C0ZZ'
			'0S5C3ZZ'
			'0S5C4ZZ'
			'0S5D0ZZ'
			'0S5D3ZZ'
			'0S5D4ZZ'
			'0SBC0ZZ'
			'0SBC3ZZ'
			'0SBC4ZZ'
			'0SBD0ZZ'
			'0SBD3ZZ'
			'0SBD4ZZ'
	OTHER LOCAL EXCISION OR DESTRUCTION OF LESION OF ANKLE JOINT	80.87	'0M5Q0ZZ'
			'0M5Q3ZZ'
			'0M5Q4ZZ'
			'0M5R0ZZ'
			'0M5R3ZZ'
			'0M5R4ZZ'
			'0MBQ0ZZ'
			'0MBQ3ZZ'
			'0MBQ4ZZ'
			'0MBR0ZZ'
			'0MBR3ZZ'
			'0MBR4ZZ'
			'0S5F0ZZ'
			'0S5F3ZZ'
			'0S5F4ZZ'
			'0S5G0ZZ'
			'0S5G3ZZ'
			'0S5G4ZZ'
			'0SBF0ZZ'
			'0SBF3ZZ'
			'0SBF4ZZ'
			'0SBG0ZZ'
			'0SBG3ZZ'
			'0SBG4ZZ'
	OTHER LOCAL EXCISION OR DESTRUCTION OF LESION OF JOINT OF FOOT AND TOE	80.88	'0M5S0ZZ'
			'0M5S3ZZ'
			'0M5S4ZZ'
			'0M5T0ZZ'
			'0M5T3ZZ'
			'0M5T4ZZ'
			'0MBS0ZZ'
			'0MBS3ZZ'
			'0MBS4ZZ'
			'0MBT0ZZ'
			'0MBT3ZZ'
			'0MBT4ZZ'
			'0S5H0ZZ'
			'0S5H3ZZ'
			'0S5H4ZZ'
			'0S5J0ZZ'
			'0S5J3ZZ'
			'0S5J4ZZ'
			'0S5K0ZZ'
			'0S5K3ZZ'
			'0S5K4ZZ'
			'0S5L0ZZ'
			'0S5L3ZZ'
			'0S5L4ZZ'
			'0S5M0ZZ'
			'0S5M3ZZ'
			'0S5M4ZZ'
			'0S5N0ZZ'
			'0S5N3ZZ'
			'0S5N4ZZ'
			'0S5P0ZZ'
			'0S5P3ZZ'
			'0S5P4ZZ'
			'0S5Q0ZZ'
			'0S5Q3ZZ'
			'0S5Q4ZZ'
			'0SBH0ZZ'
			'0SBH3ZZ'
			'0SBH4ZZ'
			'0SBJ0ZZ'
			'0SBJ3ZZ'
			'0SBJ4ZZ'
			'0SBK0ZZ'
			'0SBK3ZZ'
			'0SBK4ZZ'
			'0SBL0ZZ'
			'0SBL3ZZ'
			'0SBL4ZZ'
			'0SBM0ZZ'
			'0SBM3ZZ'
			'0SBM4ZZ'
			'0SBN0ZZ'
			'0SBN3ZZ'
			'0SBN4ZZ'
			'0SBP0ZZ'
			'0SBP3ZZ'
			'0SBP4ZZ'
			'0SBQ0ZZ'
			'0SBQ3ZZ'
			'0SBQ4ZZ'
	OTHER LOCAL EXCISION OR DESTRUCTION OF LESION OF JOINT OF OTHER SPECIFIED SITE	80.89	'0M500ZZ'
			'0M503ZZ'
			'0M504ZZ'
			'0M590ZZ'
			'0M593ZZ'
			'0M594ZZ'
			'0M5B0ZZ'
			'0M5B3ZZ'
			'0M5B4ZZ'
			'0M5C0ZZ'
			'0M5C3ZZ'
			'0M5C4ZZ'
			'0M5D0ZZ'
			'0M5D3ZZ'
			'0M5D4ZZ'
			'0M5F0ZZ'
			'0M5F3ZZ'
			'0M5F4ZZ'
			'0M5G0ZZ'
			'0M5G3ZZ'
			'0M5G4ZZ'
			'0MB00ZZ'
			'0MB03ZZ'
			'0MB04ZZ'
			'0MB90ZZ'
			'0MB93ZZ'
			'0MB94ZZ'
			'0MBB0ZZ'
			'0MBB3ZZ'
			'0MBB4ZZ'
			'0MBC0ZZ'
			'0MBC3ZZ'
			'0MBC4ZZ'
			'0MBD0ZZ'
			'0MBD3ZZ'
			'0MBD4ZZ'
			'0MBF0ZZ'
			'0MBF3ZZ'
			'0MBF4ZZ'
			'0MBG0ZZ'
			'0MBG3ZZ'
			'0MBG4ZZ'
			'0MBV0ZZ'
			'0MBV3ZZ'
			'0MBV4ZZ'
			'0MBW0ZZ'
			'0MBW3ZZ'
			'0MBW4ZZ'
			'0R500ZZ'
			'0R503ZZ'
			'0R504ZZ'
			'0R510ZZ'
			'0R513ZZ'
			'0R514ZZ'
			'0R540ZZ'
			'0R543ZZ'
			'0R544ZZ'
			'0R560ZZ'
			'0R563ZZ'
			'0R564ZZ'
			'0R5A0ZZ'
			'0R5A3ZZ'
			'0R5A4ZZ'
			'0RB00ZZ'
			'0RB03ZZ'
			'0RB04ZZ'
			'0RB10ZZ'
			'0RB13ZZ'
			'0RB14ZZ'
			'0RB40ZZ'
			'0RB43ZZ'
			'0RB44ZZ'
			'0RB60ZZ'
			'0RB63ZZ'
			'0RB64ZZ'
			'0RBA0ZZ'
			'0RBA3ZZ'
			'0RBA4ZZ'
			'0S500ZZ'
			'0S503ZZ'
			'0S504ZZ'
			'0S530ZZ'
			'0S533ZZ'
			'0S534ZZ'
			'0S550ZZ'
			'0S553ZZ'
			'0S554ZZ'
			'0S560ZZ'
			'0S563ZZ'
			'0S564ZZ'
			'0S570ZZ'
			'0S573ZZ'
			'0S574ZZ'
			'0S580ZZ'
			'0S583ZZ'
			'0S584ZZ'
			'0SB00ZZ'
			'0SB03ZZ'
			'0SB04ZZ'
			'0SB30ZZ'
			'0SB33ZZ'
			'0SB34ZZ'
			'0SB50ZZ'
			'0SB53ZZ'
			'0SB54ZZ'
			'0SB60ZZ'
			'0SB63ZZ'
			'0SB64ZZ'
			'0SB70ZZ'
			'0SB73ZZ'
			'0SB74ZZ'
			'0SB80ZZ'
			'0SB83ZZ'
			'0SB84ZZ'
	OTHER EXCISION OF JOINT, UNSPECIFIED SITE	80.9	'0RB00ZZ'
			'0RB03ZZ'
			'0RB04ZZ'
			'0RB10ZZ'
			'0RB13ZZ'
			'0RB14ZZ'
			'0RB30ZZ'
			'0RB33ZZ'
			'0RB34ZZ'
			'0RB40ZZ'
			'0RB43ZZ'
			'0RB44ZZ'
			'0RB50ZZ'
			'0RB53ZZ'
			'0RB54ZZ'
			'0RB60ZZ'
			'0RB63ZZ'
			'0RB64ZZ'
			'0RB90ZZ'
			'0RB93ZZ'
			'0RB94ZZ'
			'0RBA0ZZ'
			'0RBA3ZZ'
			'0RBA4ZZ'
			'0RBB0ZZ'
			'0RBB3ZZ'
			'0RBB4ZZ'
			'0RBC0ZZ'
			'0RBC3ZZ'
			'0RBC4ZZ'
			'0RBD0ZZ'
			'0RBD3ZZ'
			'0RBD4ZZ'
			'0RBE0ZZ'
			'0RBE3ZZ'
			'0RBE4ZZ'
			'0RBF0ZZ'
			'0RBF3ZZ'
			'0RBF4ZZ'
			'0RBG0ZZ'
			'0RBG3ZZ'
			'0RBG4ZZ'
			'0RBH0ZZ'
			'0RBH3ZZ'
			'0RBH4ZZ'
			'0RBJ0ZZ'
			'0RBJ3ZZ'
			'0RBJ4ZZ'
			'0RBK0ZZ'
			'0RBK3ZZ'
			'0RBK4ZZ'
			'0RBL0ZZ'
			'0RBL3ZZ'
			'0RBL4ZZ'
			'0RBM0ZZ'
			'0RBM3ZZ'
			'0RBM4ZZ'
			'0RBN0ZZ'
			'0RBN3ZZ'
			'0RBN4ZZ'
			'0RBP0ZZ'
			'0RBP3ZZ'
			'0RBP4ZZ'
			'0RBQ0ZZ'
			'0RBQ3ZZ'
			'0RBQ4ZZ'
			'0RBR0ZZ'
			'0RBR3ZZ'
			'0RBR4ZZ'
			'0RBS0ZZ'
			'0RBS3ZZ'
			'0RBS4ZZ'
			'0RBT0ZZ'
			'0RBT3ZZ'
			'0RBT4ZZ'
			'0RBU0ZZ'
			'0RBU3ZZ'
			'0RBU4ZZ'
			'0RBV0ZZ'
			'0RBV3ZZ'
			'0RBV4ZZ'
			'0RBW0ZZ'
			'0RBW3ZZ'
			'0RBW4ZZ'
			'0RBX0ZZ'
			'0RBX3ZZ'
			'0RBX4ZZ'
			'0SB00ZZ'
			'0SB03ZZ'
			'0SB04ZZ'
			'0SB20ZZ'
			'0SB23ZZ'
			'0SB24ZZ'
			'0SB30ZZ'
			'0SB33ZZ'
			'0SB34ZZ'
			'0SB40ZZ'
			'0SB43ZZ'
			'0SB44ZZ'
			'0SB50ZZ'
			'0SB53ZZ'
			'0SB54ZZ'
			'0SB60ZZ'
			'0SB63ZZ'
			'0SB64ZZ'
			'0SB70ZZ'
			'0SB73ZZ'
			'0SB74ZZ'
			'0SB80ZZ'
			'0SB83ZZ'
			'0SB84ZZ'
			'0SB90ZZ'
			'0SB93ZZ'
			'0SB94ZZ'
			'0SBB0ZZ'
			'0SBB3ZZ'
			'0SBB4ZZ'
			'0SBC0ZZ'
			'0SBC3ZZ'
			'0SBC4ZZ'
			'0SBD0ZZ'
			'0SBD3ZZ'
			'0SBD4ZZ'
			'0SBF0ZZ'
			'0SBF3ZZ'
			'0SBF4ZZ'
			'0SBG0ZZ'
			'0SBG3ZZ'
			'0SBG4ZZ'
			'0SBK0ZZ'
			'0SBK3ZZ'
			'0SBK4ZZ'
			'0SBL0ZZ'
			'0SBL3ZZ'
			'0SBL4ZZ'
			'0SBM0ZZ'
			'0SBM3ZZ'
			'0SBM4ZZ'
			'0SBN0ZZ'
			'0SBN3ZZ'
			'0SBN4ZZ'
			'0SBP0ZZ'
			'0SBP3ZZ'
			'0SBP4ZZ'
			'0SBQ0ZZ'
			'0SBQ3ZZ'
			'0SBQ4ZZ'
	OTHER EXCISION OF SHOULDER JOINT	80.91	'0MB10ZZ'
			'0MB13ZZ'
			'0MB14ZZ'
			'0MB20ZZ'
			'0MB23ZZ'
			'0MB24ZZ'
			'0MT10ZZ'
			'0MT14ZZ'
			'0MT20ZZ'
			'0MT24ZZ'
			'0RBE0ZZ'
			'0RBE3ZZ'
			'0RBE4ZZ'
			'0RBF0ZZ'
			'0RBF3ZZ'
			'0RBF4ZZ'
			'0RBG0ZZ'
			'0RBG3ZZ'
			'0RBG4ZZ'
			'0RBH0ZZ'
			'0RBH3ZZ'
			'0RBH4ZZ'
			'0RBJ0ZZ'
			'0RBJ3ZZ'
			'0RBJ4ZZ'
			'0RBK0ZZ'
			'0RBK3ZZ'
			'0RBK4ZZ'
			'0RTE0ZZ'
			'0RTF0ZZ'
			'0RTG0ZZ'
			'0RTH0ZZ'
			'0RTJ0ZZ'
			'0RTK0ZZ'
	OTHER EXCISION OF ELBOW JOINT	80.92	'0MB30ZZ'
			'0MB33ZZ'
			'0MB34ZZ'
			'0MB40ZZ'
			'0MB43ZZ'
			'0MB44ZZ'
			'0MT30ZZ'
			'0MT34ZZ'
			'0MT40ZZ'
			'0MT44ZZ'
			'0RBL0ZZ'
			'0RBL3ZZ'
			'0RBL4ZZ'
			'0RBM0ZZ'
			'0RBM3ZZ'
			'0RBM4ZZ'
			'0RTL0ZZ'
			'0RTM0ZZ'
	OTHER EXCISION OF WRIST JOINT	80.93	'0MB50ZZ'
			'0MB53ZZ'
			'0MB54ZZ'
			'0MB60ZZ'
			'0MB63ZZ'
			'0MB64ZZ'
			'0MT50ZZ'
			'0MT54ZZ'
			'0MT60ZZ'
			'0MT64ZZ'
			'0RBN0ZZ'
			'0RBN3ZZ'
			'0RBN4ZZ'
			'0RBP0ZZ'
			'0RBP3ZZ'
			'0RBP4ZZ'
			'0RTN0ZZ'
			'0RTP0ZZ'
			'0RTS0ZZ'
			'0RTT0ZZ'
	OTHER EXCISION OF JOINT OF HAND AND FINGER	80.94	'0MB70ZZ'
			'0MB73ZZ'
			'0MB74ZZ'
			'0MB80ZZ'
			'0MB83ZZ'
			'0MB84ZZ'
			'0MT70ZZ'
			'0MT74ZZ'
			'0MT80ZZ'
			'0MT84ZZ'
			'0RBQ0ZZ'
			'0RBQ3ZZ'
			'0RBQ4ZZ'
			'0RBR0ZZ'
			'0RBR3ZZ'
			'0RBR4ZZ'
			'0RBS0ZZ'
			'0RBS3ZZ'
			'0RBS4ZZ'
			'0RBT0ZZ'
			'0RBT3ZZ'
			'0RBT4ZZ'
			'0RBU0ZZ'
			'0RBU3ZZ'
			'0RBU4ZZ'
			'0RBV0ZZ'
			'0RBV3ZZ'
			'0RBV4ZZ'
			'0RBW0ZZ'
			'0RBW3ZZ'
			'0RBW4ZZ'
			'0RBX0ZZ'
			'0RBX3ZZ'
			'0RBX4ZZ'
			'0RTQ0ZZ'
			'0RTR0ZZ'
			'0RTU0ZZ'
			'0RTV0ZZ'
			'0RTW0ZZ'
			'0RTX0ZZ'
	OTHER EXCISION OF HIP JOINT	80.95	'0MBL0ZZ'
			'0MBL3ZZ'
			'0MBL4ZZ'
			'0MBM0ZZ'
			'0MBM3ZZ'
			'0MBM4ZZ'
			'0MTL0ZZ'
			'0MTL4ZZ'
			'0MTM0ZZ'
			'0MTM4ZZ'
			'0SB90ZZ'
			'0SB93ZZ'
			'0SB94ZZ'
			'0SBB0ZZ'
			'0SBB3ZZ'
			'0SBB4ZZ'
			'0ST90ZZ'
			'0STB0ZZ'
	OTHER EXCISION OF KNEE JOINT	80.96	'0MBN0ZZ'
			'0MBN3ZZ'
			'0MBN4ZZ'
			'0MBP0ZZ'
			'0MBP3ZZ'
			'0MBP4ZZ'
			'0MTN0ZZ'
			'0MTN4ZZ'
			'0MTP0ZZ'
			'0MTP4ZZ'
			'0SBC0ZZ'
			'0SBC3ZZ'
			'0SBC4ZZ'
			'0SBD0ZZ'
			'0SBD3ZZ'
			'0SBD4ZZ'
			'0STC0ZZ'
			'0STD0ZZ'
	OTHER EXCISION OF ANKLE JOINT	80.97	'0MBQ0ZZ'
			'0MBQ3ZZ'
			'0MBQ4ZZ'
			'0MBR0ZZ'
			'0MBR3ZZ'
			'0MBR4ZZ'
			'0MTQ0ZZ'
			'0MTQ4ZZ'
			'0MTR0ZZ'
			'0MTR4ZZ'
			'0SBF0ZZ'
			'0SBF3ZZ'
			'0SBF4ZZ'
			'0SBG0ZZ'
			'0SBG3ZZ'
			'0SBG4ZZ'
			'0STF0ZZ'
			'0STG0ZZ'
	OTHER EXCISION OF JOINT OF FOOT AND TOE	80.98	'0MBS0ZZ'
			'0MBS3ZZ'
			'0MBS4ZZ'
			'0MBT0ZZ'
			'0MBT3ZZ'
			'0MBT4ZZ'
			'0MTS0ZZ'
			'0MTS4ZZ'
			'0MTT0ZZ'
			'0MTT4ZZ'
			'0SBH0ZZ'
			'0SBH3ZZ'
			'0SBH4ZZ'
			'0SBJ0ZZ'
			'0SBJ3ZZ'
			'0SBJ4ZZ'
			'0SBK0ZZ'
			'0SBK3ZZ'
			'0SBK4ZZ'
			'0SBL0ZZ'
			'0SBL3ZZ'
			'0SBL4ZZ'
			'0SBM0ZZ'
			'0SBM3ZZ'
			'0SBM4ZZ'
			'0SBN0ZZ'
			'0SBN3ZZ'
			'0SBN4ZZ'
			'0SBP0ZZ'
			'0SBP3ZZ'
			'0SBP4ZZ'
			'0SBQ0ZZ'
			'0SBQ3ZZ'
			'0SBQ4ZZ'
			'0STH0ZZ'
			'0STJ0ZZ'
			'0STK0ZZ'
			'0STL0ZZ'
			'0STM0ZZ'
			'0STN0ZZ'
			'0STP0ZZ'
			'0STQ0ZZ'
	OTHER EXCISION OF JOINT OF OTHER SPECIFIED SITE	80.99	'0MB00ZZ'
			'0MB03ZZ'
			'0MB04ZZ'
			'0MB90ZZ'
			'0MB93ZZ'
			'0MB94ZZ'
			'0MBB0ZZ'
			'0MBB3ZZ'
			'0MBB4ZZ'
			'0MBC0ZZ'
			'0MBC3ZZ'
			'0MBC4ZZ'
			'0MBD0ZZ'
			'0MBD3ZZ'
			'0MBD4ZZ'
			'0MBF0ZZ'
			'0MBF3ZZ'
			'0MBF4ZZ'
			'0MBG0ZZ'
			'0MBG3ZZ'
			'0MBG4ZZ'
			'0MBV0ZZ'
			'0MBV3ZZ'
			'0MBV4ZZ'
			'0MBW0ZZ'
			'0MBW3ZZ'
			'0MBW4ZZ'
			'0MT00ZZ'
			'0MT04ZZ'
			'0MT90ZZ'
			'0MT94ZZ'
			'0MTB0ZZ'
			'0MTB4ZZ'
			'0MTC0ZZ'
			'0MTC4ZZ'
			'0MTD0ZZ'
			'0MTD4ZZ'
			'0MTF0ZZ'
			'0MTF4ZZ'
			'0MTG0ZZ'
			'0MTG4ZZ'
			'0MTV0ZZ'
			'0MTV4ZZ'
			'0MTW0ZZ'
			'0MTW4ZZ'
			'0RB00ZZ'
			'0RB03ZZ'
			'0RB04ZZ'
			'0RB10ZZ'
			'0RB13ZZ'
			'0RB14ZZ'
			'0RB40ZZ'
			'0RB43ZZ'
			'0RB44ZZ'
			'0RB60ZZ'
			'0RB63ZZ'
			'0RB64ZZ'
			'0RBA0ZZ'
			'0RBA3ZZ'
			'0RBA4ZZ'
			'0SB00ZZ'
			'0SB03ZZ'
			'0SB04ZZ'
			'0SB30ZZ'
			'0SB33ZZ'
			'0SB34ZZ'
			'0SB50ZZ'
			'0SB53ZZ'
			'0SB54ZZ'
			'0SB60ZZ'
			'0SB63ZZ'
			'0SB64ZZ'
			'0SB70ZZ'
			'0SB73ZZ'
			'0SB74ZZ'
			'0SB80ZZ'
			'0SB83ZZ'
			'0SB84ZZ'
Arthroplasty
	TOTAL HIP REPLACEMENT	81.51	'0SR90J9'	27130
			'0SR90JA'	27132
			'0SR90JZ'
			'0SRB0J9'
			'0SRB0JA'
			'0SRB0JZ'
	PARTIAL HIP REPLACEMENT	81.52	'0SRA009'	27125
			'0SRA00A'
			'0SRA00Z'
			'0SRA019'
			'0SRA01A'
			'0SRA01Z'
			'0SRA039'
			'0SRA03A'
			'0SRA03Z'
			'0SRA07Z'
			'0SRA0J9'
			'0SRA0JA'
			'0SRA0JZ'
			'0SRA0KZ'
			'0SRE009'
			'0SRE00A'
			'0SRE00Z'
			'0SRE019'
			'0SRE01A'
			'0SRE01Z'
			'0SRE039'
			'0SRE03A'
			'0SRE03Z'
			'0SRE07Z'
			'0SRE0J9'
			'0SRE0JA'
			'0SRE0JZ'
			'0SRE0KZ'
			'0SRR019'
			'0SRR01A'
			'0SRR01Z'
			'0SRR039'
			'0SRR03A'
			'0SRR03Z'
			'0SRR07Z'
			'0SRR0J9'
			'0SRR0JA'
			'0SRR0JZ'
			'0SRR0KZ'
			'0SRS019'
			'0SRS01A'
			'0SRS01Z'
[truncated: 418 more rows]

## Sheet: Appendix F
Appendix F. Fracture Codes
CPT	21800
CPT	21805
CPT	21810
CPT	21811
CPT	21812
CPT	21813
CPT	21820
CPT	21825
CPT	22305
CPT	22310
CPT	22520
CPT	22521
CPT	22523
CPT	22524
CPT	23500
CPT	23505
CPT	23515
CPT	23570
CPT	23575
CPT	23585
CPT	23600
CPT	23605
CPT	23615
CPT	23616
CPT	23620
CPT	23625
CPT	23630
CPT	24500
CPT	24505
CPT	24515
CPT	24516
CPT	24530
CPT	24535
CPT	24538
CPT	24545
CPT	24546
CPT	24560
CPT	24565
CPT	24566
CPT	24575
CPT	24576
CPT	24577
CPT	24579
CPT	24582
CPT	24650
CPT	24655
CPT	24665
CPT	24666
CPT	24670
CPT	24675
CPT	24685
CPT	25500
CPT	25505
CPT	25515
CPT	25520
CPT	25525
CPT	25526
CPT	25530
CPT	25535
CPT	25545
CPT	25560
CPT	25565
CPT	25574
CPT	25575
CPT	25600
CPT	25605
CPT	25606
CPT	25607
CPT	25608
CPT	25609
CPT	25622
CPT	25624
CPT	25628
CPT	25630
CPT	25635
CPT	25645
CPT	25650
CPT	25651
CPT	25652
CPT	25680
CPT	25685
CPT	26600
CPT	26605
CPT	26607
CPT	26608
CPT	26615
CPT	27200
CPT	27202
CPT	27215
CPT	27220
CPT	27222
CPT	27226
CPT	27227
CPT	27228
CPT	27230
CPT	27232
CPT	27235
CPT	27236
CPT	27238
CPT	27240
CPT	27244
CPT	27245
CPT	27246
CPT	27248
CPT	27254
CPT	27267
CPT	27268
CPT	27269
CPT	27500
CPT	27501
CPT	27502
CPT	27503
CPT	27506
CPT	27507
CPT	27508
CPT	27509
CPT	27510
CPT	27511
CPT	27513
CPT	27514
CPT	27520
CPT	27524
CPT	27530
CPT	27532
CPT	27535
CPT	27536
CPT	27538
CPT	27540
CPT	27750
CPT	27752
CPT	27756
CPT	27758
CPT	27759
CPT	27760
CPT	27762
CPT	27766
CPT	27767
CPT	27768
CPT	27769
CPT	27780
CPT	27781
CPT	27784
CPT	27786
CPT	27788
CPT	27792
CPT	27808
CPT	27810
CPT	27814
CPT	27816
CPT	27818
CPT	27822
CPT	27823
CPT	27824
CPT	27825
CPT	27826
CPT	27827
CPT	27828
CPT	28400
CPT	28405
CPT	28406
CPT	28415
CPT	28420
CPT	28430
CPT	28435
CPT	28436
CPT	28445
CPT	28450
CPT	28455
CPT	28456
CPT	28465
CPT	28470
CPT	28475
CPT	28476
CPT	28485
CPT	29850
CPT	29851
CPT	29855
CPT	29856
HCPCS	S2360
ICD10CM	M48.40XA
ICD10CM	M48.41XA
ICD10CM	M48.42XA
ICD10CM	M48.43XA
ICD10CM	M48.44XA
ICD10CM	M48.45XA
ICD10CM	M48.46XA
ICD10CM	M48.47XA
ICD10CM	M48.48XA
ICD10CM	M80.00XA
ICD10CM	M80.011A
ICD10CM	M80.012A
ICD10CM	M80.019A
ICD10CM	M80.021A
ICD10CM	M80.022A
ICD10CM	M80.029A
ICD10CM	M80.031A
ICD10CM	M80.032A
ICD10CM	M80.039A
ICD10CM	M80.041A
ICD10CM	M80.042A
ICD10CM	M80.049A
ICD10CM	M80.051A
ICD10CM	M80.052A
ICD10CM	M80.059A
ICD10CM	M80.061A
ICD10CM	M80.062A
ICD10CM	M80.069A
ICD10CM	M80.071A
ICD10CM	M80.072A
ICD10CM	M80.079A
ICD10CM	M80.08XA
ICD10CM	M80.80XA
ICD10CM	M80.811A
ICD10CM	M80.812A
ICD10CM	M80.819A
ICD10CM	M80.821A
ICD10CM	M80.822A
ICD10CM	M80.829A
ICD10CM	M80.831A
ICD10CM	M80.832A
ICD10CM	M80.839A
ICD10CM	M80.841A
ICD10CM	M80.842A
ICD10CM	M80.849A
ICD10CM	M80.851A
ICD10CM	M80.852A
ICD10CM	M80.859A
ICD10CM	M80.861A
ICD10CM	M80.862A
ICD10CM	M80.869A
ICD10CM	M80.871A
ICD10CM	M80.872A
ICD10CM	M80.879A
ICD10CM	M80.88XA
ICD10CM	M84.311A
ICD10CM	M84.312A
ICD10CM	M84.319A
ICD10CM	M84.321A
ICD10CM	M84.322A
ICD10CM	M84.329A
ICD10CM	M84.331A
ICD10CM	M84.332A
ICD10CM	M84.333A
ICD10CM	M84.334A
ICD10CM	M84.339A
ICD10CM	M84.341A
ICD10CM	M84.342A
ICD10CM	M84.343A
ICD10CM	M84.350A
ICD10CM	M84.351A
ICD10CM	M84.352A
ICD10CM	M84.353A
ICD10CM	M84.359A
ICD10CM	M84.361A
ICD10CM	M84.362A
ICD10CM	M84.363A
ICD10CM	M84.364A
ICD10CM	M84.369A
ICD10CM	M84.371A
ICD10CM	M84.372A
ICD10CM	M84.373A
ICD10CM	M84.374A
ICD10CM	M84.375A
ICD10CM	M84.376A
ICD10CM	M84.38XA
ICD10CM	M97.01XA
ICD10CM	M97.02XA
ICD10CM	M97.11XA
ICD10CM	M97.12XA
ICD10CM	M97.21XA
ICD10CM	M97.22XA
ICD10CM	M97.31XA
ICD10CM	M97.32XA
ICD10CM	M97.41XA
ICD10CM	M97.42XA
ICD10CM	S12.000A
ICD10CM	S12.000B
ICD10CM	S12.001A
ICD10CM	S12.001B
ICD10CM	S12.01XA
ICD10CM	S12.01XB
ICD10CM	S12.02XA
ICD10CM	S12.02XB
ICD10CM	S12.030A
ICD10CM	S12.030B
ICD10CM	S12.031A
ICD10CM	S12.031B
ICD10CM	S12.040A
ICD10CM	S12.040B
ICD10CM	S12.041A
ICD10CM	S12.041B
ICD10CM	S12.090A
ICD10CM	S12.090B
ICD10CM	S12.091A
ICD10CM	S12.091B
ICD10CM	S12.100A
ICD10CM	S12.100B
ICD10CM	S12.101A
ICD10CM	S12.101B
ICD10CM	S12.110A
ICD10CM	S12.110B
ICD10CM	S12.111A
ICD10CM	S12.111B
ICD10CM	S12.112A
ICD10CM	S12.112B
ICD10CM	S12.120A
ICD10CM	S12.120B
ICD10CM	S12.121A
ICD10CM	S12.121B
ICD10CM	S12.130A
ICD10CM	S12.130B
ICD10CM	S12.131A
ICD10CM	S12.131B
ICD10CM	S12.14XA
ICD10CM	S12.14XB
ICD10CM	S12.150A
ICD10CM	S12.150B
ICD10CM	S12.151A
ICD10CM	S12.151B
ICD10CM	S12.190A
ICD10CM	S12.190B
ICD10CM	S12.191A
ICD10CM	S12.191B
ICD10CM	S12.200A
ICD10CM	S12.200B
ICD10CM	S12.201A
ICD10CM	S12.201B
ICD10CM	S12.230A
ICD10CM	S12.230B
ICD10CM	S12.231A
ICD10CM	S12.231B
ICD10CM	S12.24XA
ICD10CM	S12.24XB
ICD10CM	S12.250A
ICD10CM	S12.250B
ICD10CM	S12.251A
ICD10CM	S12.251B
ICD10CM	S12.290A
ICD10CM	S12.290B
ICD10CM	S12.291A
ICD10CM	S12.291B
ICD10CM	S12.300A
ICD10CM	S12.300B
ICD10CM	S12.301A
ICD10CM	S12.301B
ICD10CM	S12.330A
ICD10CM	S12.330B
ICD10CM	S12.331A
ICD10CM	S12.331B
ICD10CM	S12.34XA
ICD10CM	S12.34XB
ICD10CM	S12.350A
ICD10CM	S12.350B
ICD10CM	S12.351A
ICD10CM	S12.351B
ICD10CM	S12.390A
ICD10CM	S12.390B
ICD10CM	S12.391A
ICD10CM	S12.391B
ICD10CM	S12.400A
ICD10CM	S12.400B
ICD10CM	S12.401A
ICD10CM	S12.401B
ICD10CM	S12.430A
ICD10CM	S12.430B
ICD10CM	S12.431A
ICD10CM	S12.431B
ICD10CM	S12.44XA
ICD10CM	S12.44XB
ICD10CM	S12.450A
ICD10CM	S12.450B
ICD10CM	S12.451A
ICD10CM	S12.451B
ICD10CM	S12.490A
ICD10CM	S12.490B
ICD10CM	S12.491A
ICD10CM	S12.491B
ICD10CM	S12.500A
ICD10CM	S12.500B
ICD10CM	S12.501A
ICD10CM	S12.501B
ICD10CM	S12.530A
ICD10CM	S12.530B
ICD10CM	S12.531A
ICD10CM	S12.531B
ICD10CM	S12.54XA
ICD10CM	S12.54XB
ICD10CM	S12.550A
ICD10CM	S12.550B
ICD10CM	S12.551A
ICD10CM	S12.551B
ICD10CM	S12.590A
ICD10CM	S12.590B
ICD10CM	S12.591A
ICD10CM	S12.591B
ICD10CM	S12.600A
ICD10CM	S12.600B
ICD10CM	S12.601A
ICD10CM	S12.601B
ICD10CM	S12.630A
ICD10CM	S12.630B
ICD10CM	S12.631A
ICD10CM	S12.631B
ICD10CM	S12.64XA
ICD10CM	S12.64XB
ICD10CM	S12.650A
ICD10CM	S12.650B
ICD10CM	S12.651A
ICD10CM	S12.651B
ICD10CM	S12.690A
ICD10CM	S12.690B
ICD10CM	S12.691A
ICD10CM	S12.691B
ICD10CM	S12.8XXA
ICD10CM	S12.9XXA
ICD10CM	S22.000A
ICD10CM	S22.000B
ICD10CM	S22.001A
ICD10CM	S22.001B
ICD10CM	S22.002A
ICD10CM	S22.002B
ICD10CM	S22.008A
ICD10CM	S22.008B
ICD10CM	S22.009A
ICD10CM	S22.009B
ICD10CM	S22.010A
ICD10CM	S22.010B
ICD10CM	S22.011A
ICD10CM	S22.011B
ICD10CM	S22.012A
ICD10CM	S22.012B
ICD10CM	S22.018A
ICD10CM	S22.018B
ICD10CM	S22.019A
ICD10CM	S22.019B
ICD10CM	S22.020A
ICD10CM	S22.020B
ICD10CM	S22.021A
ICD10CM	S22.021B
ICD10CM	S22.022A
ICD10CM	S22.022B
ICD10CM	S22.028A
ICD10CM	S22.028B
ICD10CM	S22.029A
ICD10CM	S22.029B
ICD10CM	S22.030A
ICD10CM	S22.030B
ICD10CM	S22.031A
ICD10CM	S22.031B
ICD10CM	S22.032A
ICD10CM	S22.032B
ICD10CM	S22.038A
ICD10CM	S22.038B
ICD10CM	S22.039A
ICD10CM	S22.039B
ICD10CM	S22.040A
ICD10CM	S22.040B
ICD10CM	S22.041A
ICD10CM	S22.041B
ICD10CM	S22.042A
ICD10CM	S22.042B
ICD10CM	S22.048A
ICD10CM	S22.048B
ICD10CM	S22.049A
ICD10CM	S22.049B
ICD10CM	S22.050A
ICD10CM	S22.050B
ICD10CM	S22.051A
ICD10CM	S22.051B
ICD10CM	S22.052A
ICD10CM	S22.052B
ICD10CM	S22.058A
ICD10CM	S22.058B
ICD10CM	S22.059A
ICD10CM	S22.059B
ICD10CM	S22.060A
ICD10CM	S22.060B
ICD10CM	S22.061A
ICD10CM	S22.061B
ICD10CM	S22.062A
ICD10CM	S22.062B
ICD10CM	S22.068A
ICD10CM	S22.068B
ICD10CM	S22.069A
ICD10CM	S22.069B
ICD10CM	S22.070A
ICD10CM	S22.070B
ICD10CM	S22.071A
ICD10CM	S22.071B
ICD10CM	S22.072A
ICD10CM	S22.072B
ICD10CM	S22.078A
ICD10CM	S22.078B
ICD10CM	S22.079A
ICD10CM	S22.079B
ICD10CM	S22.080A
ICD10CM	S22.080B
ICD10CM	S22.081A
ICD10CM	S22.081B
ICD10CM	S22.082A
ICD10CM	S22.082B
ICD10CM	S22.088A
ICD10CM	S22.088B
ICD10CM	S22.089A
ICD10CM	S22.089B
ICD10CM	S22.20XA
ICD10CM	S22.20XB
ICD10CM	S22.21XA
ICD10CM	S22.21XB
ICD10CM	S22.22XA
ICD10CM	S22.22XB
ICD10CM	S22.23XA
ICD10CM	S22.23XB
ICD10CM	S22.24XA
ICD10CM	S22.24XB
ICD10CM	S22.31XA
ICD10CM	S22.31XB
ICD10CM	S22.32XA
ICD10CM	S22.32XB
ICD10CM	S22.39XA
ICD10CM	S22.39XB
ICD10CM	S22.41XA
ICD10CM	S22.41XB
ICD10CM	S22.42XA
ICD10CM	S22.42XB
ICD10CM	S22.43XA
ICD10CM	S22.43XB
ICD10CM	S22.49XA
ICD10CM	S22.49XB
ICD10CM	S22.5XXA
ICD10CM	S22.5XXB
ICD10CM	S22.9XXA
ICD10CM	S22.9XXB
ICD10CM	S32.000A
ICD10CM	S32.000B
ICD10CM	S32.001A
ICD10CM	S32.001B
ICD10CM	S32.002A
ICD10CM	S32.002B
ICD10CM	S32.008A
ICD10CM	S32.008B
ICD10CM	S32.009A
ICD10CM	S32.009B
ICD10CM	S32.010A
ICD10CM	S32.010B
ICD10CM	S32.011A
ICD10CM	S32.011B
ICD10CM	S32.012A
ICD10CM	S32.012B
ICD10CM	S32.018A
ICD10CM	S32.018B
ICD10CM	S32.019A
ICD10CM	S32.019B
ICD10CM	S32.020A
ICD10CM	S32.020B
ICD10CM	S32.021A
ICD10CM	S32.021B
ICD10CM	S32.022A
ICD10CM	S32.022B
ICD10CM	S32.028A
ICD10CM	S32.028B
ICD10CM	S32.029A
ICD10CM	S32.029B
ICD10CM	S32.030A
ICD10CM	S32.030B
ICD10CM	S32.031A
ICD10CM	S32.031B
ICD10CM	S32.032A
ICD10CM	S32.032B
ICD10CM	S32.038A
ICD10CM	S32.038B
ICD10CM	S32.039A
ICD10CM	S32.039B
ICD10CM	S32.040A
ICD10CM	S32.040B
ICD10CM	S32.041A
ICD10CM	S32.041B
ICD10CM	S32.042A
ICD10CM	S32.042B
ICD10CM	S32.048A
ICD10CM	S32.048B
ICD10CM	S32.049A
ICD10CM	S32.049B
ICD10CM	S32.050A
ICD10CM	S32.050B
ICD10CM	S32.051A
ICD10CM	S32.051B
ICD10CM	S32.052A
ICD10CM	S32.052B
ICD10CM	S32.058A
ICD10CM	S32.058B
ICD10CM	S32.059A
ICD10CM	S32.059B
ICD10CM	S32.10XA
ICD10CM	S32.10XB
ICD10CM	S32.110A
ICD10CM	S32.110B
ICD10CM	S32.111A
ICD10CM	S32.111B
ICD10CM	S32.112A
ICD10CM	S32.112B
ICD10CM	S32.119A
ICD10CM	S32.119B
ICD10CM	S32.120A
ICD10CM	S32.120B
ICD10CM	S32.121A
ICD10CM	S32.121B
ICD10CM	S32.122A
ICD10CM	S32.122B
ICD10CM	S32.129A
ICD10CM	S32.129B
ICD10CM	S32.130A
ICD10CM	S32.130B
ICD10CM	S32.131A
ICD10CM	S32.131B
ICD10CM	S32.132A
ICD10CM	S32.132B
ICD10CM	S32.139A
ICD10CM	S32.139B
ICD10CM	S32.14XA
ICD10CM	S32.14XB
ICD10CM	S32.15XA
ICD10CM	S32.15XB
ICD10CM	S32.16XA
ICD10CM	S32.16XB
ICD10CM	S32.17XA
ICD10CM	S32.17XB
ICD10CM	S32.19XA
ICD10CM	S32.19XB
ICD10CM	S32.2XXA
ICD10CM	S32.2XXB
ICD10CM	S32.301A
ICD10CM	S32.301B
ICD10CM	S32.302A
ICD10CM	S32.302B
ICD10CM	S32.309A
ICD10CM	S32.309B
ICD10CM	S32.311A
ICD10CM	S32.311B
ICD10CM	S32.312A
ICD10CM	S32.312B
ICD10CM	S32.313A
ICD10CM	S32.313B
ICD10CM	S32.314A
ICD10CM	S32.314B
ICD10CM	S32.315A
ICD10CM	S32.315B
ICD10CM	S32.316A
ICD10CM	S32.316B
ICD10CM	S32.391A
ICD10CM	S32.391B
ICD10CM	S32.392A
ICD10CM	S32.392B
ICD10CM	S32.399A
ICD10CM	S32.399B
ICD10CM	S32.401A
ICD10CM	S32.401B
ICD10CM	S32.402A
ICD10CM	S32.402B
ICD10CM	S32.409A
ICD10CM	S32.409B
ICD10CM	S32.411A
ICD10CM	S32.411B
ICD10CM	S32.412A
ICD10CM	S32.412B
ICD10CM	S32.413A
ICD10CM	S32.413B
ICD10CM	S32.414A
ICD10CM	S32.414B
ICD10CM	S32.415A
ICD10CM	S32.415B
ICD10CM	S32.416A
ICD10CM	S32.416B
ICD10CM	S32.421A
ICD10CM	S32.421B
ICD10CM	S32.422A
ICD10CM	S32.422B
ICD10CM	S32.423A
ICD10CM	S32.423B
ICD10CM	S32.424A
ICD10CM	S32.424B
ICD10CM	S32.425A
ICD10CM	S32.425B
ICD10CM	S32.426A
ICD10CM	S32.426B
ICD10CM	S32.431A
ICD10CM	S32.431B
ICD10CM	S32.432A
ICD10CM	S32.432B
ICD10CM	S32.433A
ICD10CM	S32.433B
ICD10CM	S32.434A
ICD10CM	S32.434B
ICD10CM	S32.435A
ICD10CM	S32.435B
ICD10CM	S32.436A
ICD10CM	S32.436B
ICD10CM	S32.441A
ICD10CM	S32.441B
ICD10CM	S32.442A
ICD10CM	S32.442B
ICD10CM	S32.443A
ICD10CM	S32.443B
ICD10CM	S32.444A
ICD10CM	S32.444B
ICD10CM	S32.445A
ICD10CM	S32.445B
ICD10CM	S32.446A
ICD10CM	S32.446B
ICD10CM	S32.451A
ICD10CM	S32.451B
ICD10CM	S32.452A
ICD10CM	S32.452B
ICD10CM	S32.453A
ICD10CM	S32.453B
ICD10CM	S32.454A
ICD10CM	S32.454B
ICD10CM	S32.455A
ICD10CM	S32.455B
ICD10CM	S32.456A
ICD10CM	S32.456B
ICD10CM	S32.461A
ICD10CM	S32.461B
ICD10CM	S32.462A
ICD10CM	S32.462B
ICD10CM	S32.463A
ICD10CM	S32.463B
ICD10CM	S32.464A
ICD10CM	S32.464B
ICD10CM	S32.465A
ICD10CM	S32.465B
ICD10CM	S32.466A
ICD10CM	S32.466B
ICD10CM	S32.471A
ICD10CM	S32.471B
ICD10CM	S32.472A
ICD10CM	S32.472B
ICD10CM	S32.473A
ICD10CM	S32.473B
ICD10CM	S32.474A
ICD10CM	S32.474B
ICD10CM	S32.475A
ICD10CM	S32.475B
ICD10CM	S32.476A
ICD10CM	S32.476B
ICD10CM	S32.481A
ICD10CM	S32.481B
ICD10CM	S32.482A
ICD10CM	S32.482B
ICD10CM	S32.483A
ICD10CM	S32.483B
ICD10CM	S32.484A
ICD10CM	S32.484B
ICD10CM	S32.485A
ICD10CM	S32.485B
ICD10CM	S32.486A
ICD10CM	S32.486B
ICD10CM	S32.491A
ICD10CM	S32.491B
ICD10CM	S32.492A
ICD10CM	S32.492B
ICD10CM	S32.499A
ICD10CM	S32.499B
ICD10CM	S32.501A
ICD10CM	S32.501B
ICD10CM	S32.502A
ICD10CM	S32.502B
ICD10CM	S32.509A
ICD10CM	S32.509B
ICD10CM	S32.511A
ICD10CM	S32.511B
ICD10CM	S32.512A
ICD10CM	S32.512B
ICD10CM	S32.519A
ICD10CM	S32.519B
ICD10CM	S32.591A
ICD10CM	S32.591B
ICD10CM	S32.592A
ICD10CM	S32.592B
ICD10CM	S32.599A
ICD10CM	S32.599B
ICD10CM	S32.601A
ICD10CM	S32.601B
ICD10CM	S32.602A
ICD10CM	S32.602B
ICD10CM	S32.609A
ICD10CM	S32.609B
ICD10CM	S32.611A
ICD10CM	S32.611B
ICD10CM	S32.612A
ICD10CM	S32.612B
ICD10CM	S32.613A
ICD10CM	S32.613B
ICD10CM	S32.614A
ICD10CM	S32.614B
ICD10CM	S32.615A
ICD10CM	S32.615B
ICD10CM	S32.616A
ICD10CM	S32.616B
ICD10CM	S32.691A
ICD10CM	S32.691B
ICD10CM	S32.692A
ICD10CM	S32.692B
ICD10CM	S32.699A
ICD10CM	S32.699B
ICD10CM	S32.810A
ICD10CM	S32.810B
ICD10CM	S32.811A
ICD10CM	S32.811B
ICD10CM	S32.82XA
ICD10CM	S32.82XB
ICD10CM	S32.89XA
ICD10CM	S32.89XB
ICD10CM	S32.9XXA
ICD10CM	S32.9XXB
ICD10CM	S42.001A
ICD10CM	S42.001B
ICD10CM	S42.002A
ICD10CM	S42.002B
ICD10CM	S42.009A
ICD10CM	S42.009B
ICD10CM	S42.011A
ICD10CM	S42.011B
ICD10CM	S42.012A
ICD10CM	S42.012B
ICD10CM	S42.013A
ICD10CM	S42.013B
ICD10CM	S42.014A
ICD10CM	S42.014B
ICD10CM	S42.015A
ICD10CM	S42.015B
ICD10CM	S42.016A
ICD10CM	S42.016B
ICD10CM	S42.017A
ICD10CM	S42.017B
ICD10CM	S42.018A
ICD10CM	S42.018B
ICD10CM	S42.019A
ICD10CM	S42.019B
ICD10CM	S42.021A
ICD10CM	S42.021B
ICD10CM	S42.022A
ICD10CM	S42.022B
ICD10CM	S42.023A
ICD10CM	S42.023B
ICD10CM	S42.024A
ICD10CM	S42.024B
ICD10CM	S42.025A
ICD10CM	S42.025B
ICD10CM	S42.026A
ICD10CM	S42.026B
ICD10CM	S42.031A
ICD10CM	S42.031B
ICD10CM	S42.032A
ICD10CM	S42.032B
ICD10CM	S42.033A
ICD10CM	S42.033B
ICD10CM	S42.034A
ICD10CM	S42.034B
ICD10CM	S42.035A
ICD10CM	S42.035B
ICD10CM	S42.036A
ICD10CM	S42.036B
ICD10CM	S42.101A
ICD10CM	S42.101B
ICD10CM	S42.102A
ICD10CM	S42.102B
ICD10CM	S42.109A
ICD10CM	S42.109B
ICD10CM	S42.111A
ICD10CM	S42.111B
ICD10CM	S42.112A
ICD10CM	S42.112B
ICD10CM	S42.113A
ICD10CM	S42.113B
ICD10CM	S42.114A
ICD10CM	S42.114B
ICD10CM	S42.115A
ICD10CM	S42.115B
ICD10CM	S42.116A
ICD10CM	S42.116B
ICD10CM	S42.121A
ICD10CM	S42.121B
ICD10CM	S42.122A
ICD10CM	S42.122B
ICD10CM	S42.123A
ICD10CM	S42.123B
ICD10CM	S42.124A
ICD10CM	S42.124B
ICD10CM	S42.125A
ICD10CM	S42.125B
ICD10CM	S42.126A
ICD10CM	S42.126B
ICD10CM	S42.131A
ICD10CM	S42.131B
ICD10CM	S42.132A
ICD10CM	S42.132B
ICD10CM	S42.133A
ICD10CM	S42.133B
ICD10CM	S42.134A
ICD10CM	S42.134B
ICD10CM	S42.135A
ICD10CM	S42.135B
ICD10CM	S42.136A
ICD10CM	S42.136B
ICD10CM	S42.141A
ICD10CM	S42.141B
ICD10CM	S42.142A
ICD10CM	S42.142B
ICD10CM	S42.143A
ICD10CM	S42.143B
ICD10CM	S42.144A
ICD10CM	S42.144B
ICD10CM	S42.145A
ICD10CM	S42.145B
ICD10CM	S42.146A
ICD10CM	S42.146B
ICD10CM	S42.151A
ICD10CM	S42.151B
ICD10CM	S42.152A
ICD10CM	S42.152B
ICD10CM	S42.153A
ICD10CM	S42.153B
ICD10CM	S42.154A
ICD10CM	S42.154B
ICD10CM	S42.155A
ICD10CM	S42.155B
ICD10CM	S42.156A
ICD10CM	S42.156B
ICD10CM	S42.191A
ICD10CM	S42.191B
ICD10CM	S42.192A
ICD10CM	S42.192B
ICD10CM	S42.199A
ICD10CM	S42.199B
ICD10CM	S42.201A
ICD10CM	S42.201B
ICD10CM	S42.202A
ICD10CM	S42.202B
ICD10CM	S42.209A
ICD10CM	S42.209B
ICD10CM	S42.211A
ICD10CM	S42.211B
ICD10CM	S42.212A
ICD10CM	S42.212B
ICD10CM	S42.213A
ICD10CM	S42.213B
ICD10CM	S42.214A
ICD10CM	S42.214B
ICD10CM	S42.215A
ICD10CM	S42.215B
ICD10CM	S42.216A
ICD10CM	S42.216B
ICD10CM	S42.221A
ICD10CM	S42.221B
ICD10CM	S42.222A
ICD10CM	S42.222B
ICD10CM	S42.223A
ICD10CM	S42.223B
ICD10CM	S42.224A
ICD10CM	S42.224B
ICD10CM	S42.225A
ICD10CM	S42.225B
ICD10CM	S42.226A
ICD10CM	S42.226B
ICD10CM	S42.231A
ICD10CM	S42.231B
ICD10CM	S42.232A
ICD10CM	S42.232B
ICD10CM	S42.239A
ICD10CM	S42.239B
ICD10CM	S42.241A
ICD10CM	S42.241B
ICD10CM	S42.242A
ICD10CM	S42.242B
ICD10CM	S42.249A
ICD10CM	S42.249B
ICD10CM	S42.251A
ICD10CM	S42.251B
ICD10CM	S42.252A
ICD10CM	S42.252B
ICD10CM	S42.253A
ICD10CM	S42.253B
ICD10CM	S42.254A
ICD10CM	S42.254B
ICD10CM	S42.255A
ICD10CM	S42.255B
ICD10CM	S42.256A
ICD10CM	S42.256B
ICD10CM	S42.261A
ICD10CM	S42.261B
ICD10CM	S42.262A
ICD10CM	S42.262B
ICD10CM	S42.263A
ICD10CM	S42.263B
ICD10CM	S42.264A
ICD10CM	S42.264B
ICD10CM	S42.265A
ICD10CM	S42.265B
ICD10CM	S42.266A
ICD10CM	S42.266B
ICD10CM	S42.271A
ICD10CM	S42.272A
ICD10CM	S42.279A
ICD10CM	S42.291A
ICD10CM	S42.291B
ICD10CM	S42.292A
ICD10CM	S42.292B
ICD10CM	S42.293A
ICD10CM	S42.293B
ICD10CM	S42.294A
ICD10CM	S42.294B
ICD10CM	S42.295A
ICD10CM	S42.295B
ICD10CM	S42.296A
ICD10CM	S42.296B
ICD10CM	S42.301A
ICD10CM	S42.301B
ICD10CM	S42.302A
ICD10CM	S42.302B
ICD10CM	S42.309A
ICD10CM	S42.309B
ICD10CM	S42.311A
ICD10CM	S42.312A
ICD10CM	S42.319A
ICD10CM	S42.321A
ICD10CM	S42.321B
ICD10CM	S42.322A
ICD10CM	S42.322B
ICD10CM	S42.323A
ICD10CM	S42.323B
ICD10CM	S42.324A
ICD10CM	S42.324B
ICD10CM	S42.325A
ICD10CM	S42.325B
ICD10CM	S42.326A
ICD10CM	S42.326B
ICD10CM	S42.331A
ICD10CM	S42.331B
ICD10CM	S42.332A
ICD10CM	S42.332B
ICD10CM	S42.333A
ICD10CM	S42.333B
ICD10CM	S42.334A
ICD10CM	S42.334B
ICD10CM	S42.335A
ICD10CM	S42.335B
ICD10CM	S42.336A
ICD10CM	S42.336B
ICD10CM	S42.341A
ICD10CM	S42.341B
ICD10CM	S42.342A
ICD10CM	S42.342B
ICD10CM	S42.343A
ICD10CM	S42.343B
ICD10CM	S42.344A
ICD10CM	S42.344B
ICD10CM	S42.345A
ICD10CM	S42.345B
ICD10CM	S42.346A
ICD10CM	S42.346B
ICD10CM	S42.351A
ICD10CM	S42.351B
ICD10CM	S42.352A
ICD10CM	S42.352B
ICD10CM	S42.353A
ICD10CM	S42.353B
ICD10CM	S42.354A
ICD10CM	S42.354B
ICD10CM	S42.355A
ICD10CM	S42.355B
ICD10CM	S42.356A
ICD10CM	S42.356B
ICD10CM	S42.361A
ICD10CM	S42.361B
ICD10CM	S42.362A
ICD10CM	S42.362B
ICD10CM	S42.363A
ICD10CM	S42.363B
ICD10CM	S42.364A
ICD10CM	S42.364B
ICD10CM	S42.365A
ICD10CM	S42.365B
ICD10CM	S42.366A
ICD10CM	S42.366B
ICD10CM	S42.391A
ICD10CM	S42.391B
ICD10CM	S42.392A
ICD10CM	S42.392B
ICD10CM	S42.399A
ICD10CM	S42.399B
ICD10CM	S42.401A
ICD10CM	S42.401B
ICD10CM	S42.402A
ICD10CM	S42.402B
ICD10CM	S42.409A
ICD10CM	S42.409B
ICD10CM	S42.411A
ICD10CM	S42.411B
ICD10CM	S42.412A
ICD10CM	S42.412B
ICD10CM	S42.413A
ICD10CM	S42.413B
ICD10CM	S42.414A
ICD10CM	S42.414B
ICD10CM	S42.415A
ICD10CM	S42.415B
ICD10CM	S42.416A
ICD10CM	S42.416B
ICD10CM	S42.421A
ICD10CM	S42.421B
ICD10CM	S42.422A
ICD10CM	S42.422B
ICD10CM	S42.423A
ICD10CM	S42.423B
ICD10CM	S42.424A
ICD10CM	S42.424B
ICD10CM	S42.425A
ICD10CM	S42.425B
ICD10CM	S42.426A
ICD10CM	S42.426B
ICD10CM	S42.431A
ICD10CM	S42.431B
ICD10CM	S42.432A
ICD10CM	S42.432B
ICD10CM	S42.433A
ICD10CM	S42.433B
ICD10CM	S42.434A
ICD10CM	S42.434B
ICD10CM	S42.435A
ICD10CM	S42.435B
ICD10CM	S42.436A
ICD10CM	S42.436B
ICD10CM	S42.441A
ICD10CM	S42.441B
ICD10CM	S42.442A
ICD10CM	S42.442B
ICD10CM	S42.443A
ICD10CM	S42.443B
ICD10CM	S42.444A
ICD10CM	S42.444B
ICD10CM	S42.445A
ICD10CM	S42.445B
ICD10CM	S42.446A
ICD10CM	S42.446B
ICD10CM	S42.447A
ICD10CM	S42.447B
ICD10CM	S42.448A
ICD10CM	S42.448B
ICD10CM	S42.449A
ICD10CM	S42.449B
ICD10CM	S42.451A
ICD10CM	S42.451B
ICD10CM	S42.452A
ICD10CM	S42.452B
ICD10CM	S42.453A
ICD10CM	S42.453B
ICD10CM	S42.454A
ICD10CM	S42.454B
ICD10CM	S42.455A
ICD10CM	S42.455B
ICD10CM	S42.456A
ICD10CM	S42.456B
ICD10CM	S42.461A
ICD10CM	S42.461B
ICD10CM	S42.462A
ICD10CM	S42.462B
ICD10CM	S42.463A
ICD10CM	S42.463B
ICD10CM	S42.464A
ICD10CM	S42.464B
ICD10CM	S42.465A
ICD10CM	S42.465B
ICD10CM	S42.466A
ICD10CM	S42.466B
ICD10CM	S42.471A
ICD10CM	S42.471B
ICD10CM	S42.472A
ICD10CM	S42.472B
ICD10CM	S42.473A
ICD10CM	S42.473B
ICD10CM	S42.474A
ICD10CM	S42.474B
ICD10CM	S42.475A
ICD10CM	S42.475B
ICD10CM	S42.476A
ICD10CM	S42.476B
ICD10CM	S42.481A
ICD10CM	S42.482A
ICD10CM	S42.489A
ICD10CM	S42.491A
ICD10CM	S42.491B
ICD10CM	S42.492A
ICD10CM	S42.492B
ICD10CM	S42.493A
ICD10CM	S42.493B
ICD10CM	S42.494A
ICD10CM	S42.494B
ICD10CM	S42.495A
ICD10CM	S42.495B
ICD10CM	S42.496A
ICD10CM	S42.496B
ICD10CM	S42.90XA
ICD10CM	S42.90XB
ICD10CM	S42.91XA
ICD10CM	S42.91XB
ICD10CM	S42.92XA
ICD10CM	S42.92XB
ICD10CM	S49.001A
ICD10CM	S49.002A
ICD10CM	S49.009A
ICD10CM	S49.011A
ICD10CM	S49.012A
ICD10CM	S49.019A
ICD10CM	S49.021A
ICD10CM	S49.022A
ICD10CM	S49.029A
ICD10CM	S49.031A
ICD10CM	S49.032A
ICD10CM	S49.039A
ICD10CM	S49.041A
ICD10CM	S49.042A
ICD10CM	S49.049A
ICD10CM	S49.091A
ICD10CM	S49.092A
ICD10CM	S49.099A
ICD10CM	S49.101A
ICD10CM	S49.102A
ICD10CM	S49.109A
ICD10CM	S49.111A
ICD10CM	S49.112A
ICD10CM	S49.119A
ICD10CM	S49.121A
ICD10CM	S49.122A
ICD10CM	S49.129A
ICD10CM	S49.131A
ICD10CM	S49.132A
ICD10CM	S49.139A
ICD10CM	S49.141A
ICD10CM	S49.142A
ICD10CM	S49.149A
ICD10CM	S49.191A
ICD10CM	S49.192A
ICD10CM	S49.199A
ICD10CM	S52.001A
ICD10CM	S52.001B
ICD10CM	S52.001C
ICD10CM	S52.002A
ICD10CM	S52.002B
ICD10CM	S52.002C
ICD10CM	S52.009A
ICD10CM	S52.009B
ICD10CM	S52.009C
ICD10CM	S52.011A
ICD10CM	S52.012A
ICD10CM	S52.019A
ICD10CM	S52.021A
ICD10CM	S52.021B
ICD10CM	S52.021C
ICD10CM	S52.022A
ICD10CM	S52.022B
ICD10CM	S52.022C
ICD10CM	S52.023A
ICD10CM	S52.023B
ICD10CM	S52.023C
ICD10CM	S52.024A
ICD10CM	S52.024B
ICD10CM	S52.024C
ICD10CM	S52.025A
ICD10CM	S52.025B
ICD10CM	S52.025C
ICD10CM	S52.026A
ICD10CM	S52.026B
ICD10CM	S52.026C
ICD10CM	S52.031A
ICD10CM	S52.031B
ICD10CM	S52.031C
ICD10CM	S52.032A
ICD10CM	S52.032B
ICD10CM	S52.032C
ICD10CM	S52.033A
ICD10CM	S52.033B
ICD10CM	S52.033C
ICD10CM	S52.034A
ICD10CM	S52.034B
ICD10CM	S52.034C
ICD10CM	S52.035A
ICD10CM	S52.035B
ICD10CM	S52.035C
ICD10CM	S52.036A
ICD10CM	S52.036B
ICD10CM	S52.036C
ICD10CM	S52.041A
ICD10CM	S52.041B
ICD10CM	S52.041C
ICD10CM	S52.042A
ICD10CM	S52.042B
ICD10CM	S52.042C
ICD10CM	S52.043A
ICD10CM	S52.043B
ICD10CM	S52.043C
ICD10CM	S52.044A
ICD10CM	S52.044B
ICD10CM	S52.044C
ICD10CM	S52.045A
ICD10CM	S52.045B
ICD10CM	S52.045C
ICD10CM	S52.046A
ICD10CM	S52.046B
ICD10CM	S52.046C
ICD10CM	S52.091A
ICD10CM	S52.091B
ICD10CM	S52.091C
ICD10CM	S52.092A
ICD10CM	S52.092B
ICD10CM	S52.092C
ICD10CM	S52.099A
ICD10CM	S52.099B
ICD10CM	S52.099C
ICD10CM	S52.101A
ICD10CM	S52.101B
ICD10CM	S52.101C
ICD10CM	S52.102A
ICD10CM	S52.102B
ICD10CM	S52.102C
ICD10CM	S52.109A
ICD10CM	S52.109B
ICD10CM	S52.109C
ICD10CM	S52.111A
ICD10CM	S52.112A
ICD10CM	S52.119A
ICD10CM	S52.121A
ICD10CM	S52.121B
ICD10CM	S52.121C
ICD10CM	S52.122A
ICD10CM	S52.122B
ICD10CM	S52.122C
ICD10CM	S52.123A
ICD10CM	S52.123B
ICD10CM	S52.123C
ICD10CM	S52.124A
ICD10CM	S52.124B
ICD10CM	S52.124C
ICD10CM	S52.125A
ICD10CM	S52.125B
ICD10CM	S52.125C
ICD10CM	S52.126A
ICD10CM	S52.126B
ICD10CM	S52.126C
ICD10CM	S52.131A
ICD10CM	S52.131B
ICD10CM	S52.131C
ICD10CM	S52.132A
ICD10CM	S52.132B
ICD10CM	S52.132C
ICD10CM	S52.133A
ICD10CM	S52.133B
ICD10CM	S52.133C
ICD10CM	S52.134A
ICD10CM	S52.134B
ICD10CM	S52.134C
ICD10CM	S52.135A
ICD10CM	S52.135B
ICD10CM	S52.135C
ICD10CM	S52.136A
ICD10CM	S52.136B
ICD10CM	S52.136C
ICD10CM	S52.181A
ICD10CM	S52.181B
ICD10CM	S52.181C
ICD10CM	S52.182A
ICD10CM	S52.182B
ICD10CM	S52.182C
ICD10CM	S52.189A
ICD10CM	S52.189B
ICD10CM	S52.189C
ICD10CM	S52.201A
ICD10CM	S52.201B
ICD10CM	S52.201C
ICD10CM	S52.202A
ICD10CM	S52.202B
ICD10CM	S52.202C
ICD10CM	S52.209A
ICD10CM	S52.209B
ICD10CM	S52.209C
ICD10CM	S52.211A
ICD10CM	S52.212A
ICD10CM	S52.219A
ICD10CM	S52.221A
ICD10CM	S52.221B
ICD10CM	S52.221C
ICD10CM	S52.222A
ICD10CM	S52.222B
ICD10CM	S52.222C
ICD10CM	S52.223A
ICD10CM	S52.223B
ICD10CM	S52.223C
ICD10CM	S52.224A
ICD10CM	S52.224B
ICD10CM	S52.224C
ICD10CM	S52.225A
ICD10CM	S52.225B
ICD10CM	S52.225C
ICD10CM	S52.226A
ICD10CM	S52.226B
ICD10CM	S52.226C
ICD10CM	S52.231A
ICD10CM	S52.231B
ICD10CM	S52.231C
ICD10CM	S52.232A
ICD10CM	S52.232B
ICD10CM	S52.232C
ICD10CM	S52.233A
ICD10CM	S52.233B
ICD10CM	S52.233C
ICD10CM	S52.234A
ICD10CM	S52.234B
ICD10CM	S52.234C
ICD10CM	S52.235A
ICD10CM	S52.235B
ICD10CM	S52.235C
ICD10CM	S52.236A
ICD10CM	S52.236B
ICD10CM	S52.236C
ICD10CM	S52.241A
ICD10CM	S52.241B
ICD10CM	S52.241C
ICD10CM	S52.242A
ICD10CM	S52.242B
ICD10CM	S52.242C
ICD10CM	S52.243A
ICD10CM	S52.243B
ICD10CM	S52.243C
ICD10CM	S52.244A
ICD10CM	S52.244B
ICD10CM	S52.244C
ICD10CM	S52.245A
ICD10CM	S52.245B
ICD10CM	S52.245C
ICD10CM	S52.246A
ICD10CM	S52.246B
ICD10CM	S52.246C
ICD10CM	S52.251A
ICD10CM	S52.251B
ICD10CM	S52.251C
ICD10CM	S52.252A
ICD10CM	S52.252B
ICD10CM	S52.252C
ICD10CM	S52.253A
ICD10CM	S52.253B
ICD10CM	S52.253C
ICD10CM	S52.254A
ICD10CM	S52.254B
ICD10CM	S52.254C
ICD10CM	S52.255A
ICD10CM	S52.255B
ICD10CM	S52.255C
ICD10CM	S52.256A
ICD10CM	S52.256B
ICD10CM	S52.256C
ICD10CM	S52.261A
ICD10CM	S52.261B
ICD10CM	S52.261C
ICD10CM	S52.262A
ICD10CM	S52.262B
ICD10CM	S52.262C
ICD10CM	S52.263A
ICD10CM	S52.263B
ICD10CM	S52.263C
ICD10CM	S52.264A
ICD10CM	S52.264B
ICD10CM	S52.264C
ICD10CM	S52.265A
ICD10CM	S52.265B
ICD10CM	S52.265C
ICD10CM	S52.266A
ICD10CM	S52.266B
ICD10CM	S52.266C
ICD10CM	S52.271A
ICD10CM	S52.271B
ICD10CM	S52.271C
ICD10CM	S52.272A
ICD10CM	S52.272B
ICD10CM	S52.272C
ICD10CM	S52.279A
ICD10CM	S52.279B
ICD10CM	S52.279C
ICD10CM	S52.281A
ICD10CM	S52.281B
ICD10CM	S52.281C
ICD10CM	S52.282A
ICD10CM	S52.282B
ICD10CM	S52.282C
ICD10CM	S52.283A
ICD10CM	S52.283B
ICD10CM	S52.283C
ICD10CM	S52.291A
ICD10CM	S52.291B
ICD10CM	S52.291C
ICD10CM	S52.292A
ICD10CM	S52.292B
ICD10CM	S52.292C
ICD10CM	S52.299A
ICD10CM	S52.299B
ICD10CM	S52.299C
ICD10CM	S52.301A
ICD10CM	S52.301B
ICD10CM	S52.301C
ICD10CM	S52.302A
ICD10CM	S52.302B
ICD10CM	S52.302C
ICD10CM	S52.309A
ICD10CM	S52.309B
ICD10CM	S52.309C
ICD10CM	S52.311A
ICD10CM	S52.312A
ICD10CM	S52.319A
ICD10CM	S52.321A
ICD10CM	S52.321B
ICD10CM	S52.321C
ICD10CM	S52.322A
ICD10CM	S52.322B
ICD10CM	S52.322C
ICD10CM	S52.323A
ICD10CM	S52.323B
ICD10CM	S52.323C
ICD10CM	S52.324A
ICD10CM	S52.324B
ICD10CM	S52.324C
ICD10CM	S52.325A
ICD10CM	S52.325B
ICD10CM	S52.325C
ICD10CM	S52.326A
ICD10CM	S52.326B
ICD10CM	S52.326C
ICD10CM	S52.331A
ICD10CM	S52.331B
ICD10CM	S52.331C
ICD10CM	S52.332A
ICD10CM	S52.332B
ICD10CM	S52.332C
ICD10CM	S52.333A
ICD10CM	S52.333B
ICD10CM	S52.333C
ICD10CM	S52.334A
ICD10CM	S52.334B
ICD10CM	S52.334C
ICD10CM	S52.335A
ICD10CM	S52.335B
ICD10CM	S52.335C
ICD10CM	S52.336A
ICD10CM	S52.336B
ICD10CM	S52.336C
ICD10CM	S52.341A
ICD10CM	S52.341B
ICD10CM	S52.341C
ICD10CM	S52.342A
ICD10CM	S52.342B
ICD10CM	S52.342C
ICD10CM	S52.343A
ICD10CM	S52.343B
ICD10CM	S52.343C
ICD10CM	S52.344A
ICD10CM	S52.344B
ICD10CM	S52.344C
ICD10CM	S52.345A
ICD10CM	S52.345B
ICD10CM	S52.345C
ICD10CM	S52.346A
ICD10CM	S52.346B
ICD10CM	S52.346C
ICD10CM	S52.351A
ICD10CM	S52.351B
ICD10CM	S52.351C
ICD10CM	S52.352A
ICD10CM	S52.352B
ICD10CM	S52.352C
ICD10CM	S52.353A
ICD10CM	S52.353B
ICD10CM	S52.353C
ICD10CM	S52.354A
ICD10CM	S52.354B
ICD10CM	S52.354C
ICD10CM	S52.355A
ICD10CM	S52.355B
ICD10CM	S52.355C
ICD10CM	S52.356A
ICD10CM	S52.356B
ICD10CM	S52.356C
ICD10CM	S52.361A
ICD10CM	S52.361B
ICD10CM	S52.361C
ICD10CM	S52.362A
ICD10CM	S52.362B
ICD10CM	S52.362C
ICD10CM	S52.363A
ICD10CM	S52.363B
ICD10CM	S52.363C
ICD10CM	S52.364A
ICD10CM	S52.364B
ICD10CM	S52.364C
ICD10CM	S52.365A
ICD10CM	S52.365B
ICD10CM	S52.365C
ICD10CM	S52.366A
ICD10CM	S52.366B
ICD10CM	S52.366C
ICD10CM	S52.371A
ICD10CM	S52.371B
ICD10CM	S52.371C
ICD10CM	S52.372A
ICD10CM	S52.372B
ICD10CM	S52.372C
ICD10CM	S52.379A
ICD10CM	S52.379B
ICD10CM	S52.379C
ICD10CM	S52.381A
ICD10CM	S52.381B
ICD10CM	S52.381C
ICD10CM	S52.382A
ICD10CM	S52.382B
ICD10CM	S52.382C
ICD10CM	S52.389A
ICD10CM	S52.389B
ICD10CM	S52.389C
ICD10CM	S52.391A
ICD10CM	S52.391B
ICD10CM	S52.391C
ICD10CM	S52.392A
ICD10CM	S52.392B
ICD10CM	S52.392C
ICD10CM	S52.399A
ICD10CM	S52.399B
ICD10CM	S52.399C
ICD10CM	S52.501A
ICD10CM	S52.501B
ICD10CM	S52.501C
ICD10CM	S52.502A
ICD10CM	S52.502B
ICD10CM	S52.502C
ICD10CM	S52.509A
ICD10CM	S52.509B
ICD10CM	S52.509C
ICD10CM	S52.511A
ICD10CM	S52.511B
ICD10CM	S52.511C
ICD10CM	S52.512A
ICD10CM	S52.512B
ICD10CM	S52.512C
ICD10CM	S52.513A
ICD10CM	S52.513B
ICD10CM	S52.513C
ICD10CM	S52.514A
ICD10CM	S52.514B
ICD10CM	S52.514C
ICD10CM	S52.515A
ICD10CM	S52.515B
ICD10CM	S52.515C
ICD10CM	S52.516A
ICD10CM	S52.516B
ICD10CM	S52.516C
ICD10CM	S52.521A
ICD10CM	S52.522A
ICD10CM	S52.529A
ICD10CM	S52.531A
ICD10CM	S52.531B
ICD10CM	S52.531C
ICD10CM	S52.532A
ICD10CM	S52.532B
ICD10CM	S52.532C
ICD10CM	S52.539A
ICD10CM	S52.539B
ICD10CM	S52.539C
ICD10CM	S52.541A
ICD10CM	S52.541B
ICD10CM	S52.541C
ICD10CM	S52.542A
ICD10CM	S52.542B
ICD10CM	S52.542C
ICD10CM	S52.549A
ICD10CM	S52.549B
ICD10CM	S52.549C
ICD10CM	S52.551A
ICD10CM	S52.551B
ICD10CM	S52.551C
ICD10CM	S52.552A
ICD10CM	S52.552B
ICD10CM	S52.552C
ICD10CM	S52.559A
ICD10CM	S52.559B
ICD10CM	S52.559C
ICD10CM	S52.561A
ICD10CM	S52.561B
ICD10CM	S52.561C
ICD10CM	S52.562A
ICD10CM	S52.562B
ICD10CM	S52.562C
ICD10CM	S52.569A
ICD10CM	S52.569B
ICD10CM	S52.569C
ICD10CM	S52.571A
ICD10CM	S52.571B
ICD10CM	S52.571C
ICD10CM	S52.572A
ICD10CM	S52.572B
ICD10CM	S52.572C
ICD10CM	S52.579A
ICD10CM	S52.579B
ICD10CM	S52.579C
ICD10CM	S52.591A
ICD10CM	S52.591B
ICD10CM	S52.591C
ICD10CM	S52.592A
ICD10CM	S52.592B
ICD10CM	S52.592C
ICD10CM	S52.599A
ICD10CM	S52.599B
ICD10CM	S52.599C
ICD10CM	S52.601A
ICD10CM	S52.601B
ICD10CM	S52.601C
ICD10CM	S52.602A
ICD10CM	S52.602B
ICD10CM	S52.602C
ICD10CM	S52.609A
ICD10CM	S52.609B
ICD10CM	S52.609C
ICD10CM	S52.611A
ICD10CM	S52.611B
ICD10CM	S52.611C
ICD10CM	S52.612A
ICD10CM	S52.612B
ICD10CM	S52.612C
ICD10CM	S52.613A
ICD10CM	S52.613B
ICD10CM	S52.613C
ICD10CM	S52.614A
ICD10CM	S52.614B
ICD10CM	S52.614C
ICD10CM	S52.615A
ICD10CM	S52.615B
ICD10CM	S52.615C
ICD10CM	S52.616A
ICD10CM	S52.616B
ICD10CM	S52.616C
ICD10CM	S52.621A
ICD10CM	S52.622A
ICD10CM	S52.629A
ICD10CM	S52.691A
ICD10CM	S52.691B
ICD10CM	S52.691C
ICD10CM	S52.692A
ICD10CM	S52.692B
ICD10CM	S52.692C
ICD10CM	S52.699A
ICD10CM	S52.699B
ICD10CM	S52.699C
ICD10CM	S52.90XA
ICD10CM	S52.90XB
ICD10CM	S52.90XC
ICD10CM	S52.91XA
ICD10CM	S52.91XB
ICD10CM	S52.91XC
ICD10CM	S52.92XA
ICD10CM	S52.92XB
ICD10CM	S52.92XC
ICD10CM	S59.001A
ICD10CM	S59.002A
ICD10CM	S59.009A
ICD10CM	S59.011A
ICD10CM	S59.012A
ICD10CM	S59.019A
ICD10CM	S59.021A
ICD10CM	S59.022A
ICD10CM	S59.029A
ICD10CM	S59.031A
ICD10CM	S59.032A
ICD10CM	S59.039A
ICD10CM	S59.041A
ICD10CM	S59.042A
ICD10CM	S59.049A
ICD10CM	S59.091A
ICD10CM	S59.092A
ICD10CM	S59.099A
ICD10CM	S59.101A
ICD10CM	S59.102A
ICD10CM	S59.109A
ICD10CM	S59.111A
ICD10CM	S59.112A
ICD10CM	S59.119A
ICD10CM	S59.121A
ICD10CM	S59.122A
ICD10CM	S59.129A
ICD10CM	S59.131A
ICD10CM	S59.132A
ICD10CM	S59.139A
ICD10CM	S59.141A
ICD10CM	S59.142A
ICD10CM	S59.149A
ICD10CM	S59.191A
ICD10CM	S59.192A
ICD10CM	S59.199A
ICD10CM	S59.201A
ICD10CM	S59.202A
ICD10CM	S59.209A
ICD10CM	S59.211A
ICD10CM	S59.212A
ICD10CM	S59.219A
ICD10CM	S59.221A
ICD10CM	S59.222A
ICD10CM	S59.229A
ICD10CM	S59.231A
ICD10CM	S59.232A
ICD10CM	S59.239A
ICD10CM	S59.241A
ICD10CM	S59.242A
ICD10CM	S59.249A
ICD10CM	S59.291A
ICD10CM	S59.292A
ICD10CM	S59.299A
ICD10CM	S62.001A
ICD10CM	S62.001B
ICD10CM	S62.002A
ICD10CM	S62.002B
ICD10CM	S62.009A
ICD10CM	S62.009B
ICD10CM	S62.011A
ICD10CM	S62.011B
ICD10CM	S62.012A
ICD10CM	S62.012B
ICD10CM	S62.013A
ICD10CM	S62.013B
ICD10CM	S62.014A
ICD10CM	S62.014B
ICD10CM	S62.015A
ICD10CM	S62.015B
ICD10CM	S62.016A
ICD10CM	S62.016B
ICD10CM	S62.021A
ICD10CM	S62.021B
ICD10CM	S62.022A
ICD10CM	S62.022B
ICD10CM	S62.023A
ICD10CM	S62.023B
ICD10CM	S62.024A
ICD10CM	S62.024B
ICD10CM	S62.025A
ICD10CM	S62.025B
ICD10CM	S62.026A
ICD10CM	S62.026B
ICD10CM	S62.031A
ICD10CM	S62.031B
ICD10CM	S62.032A
ICD10CM	S62.032B
ICD10CM	S62.033A
ICD10CM	S62.033B
ICD10CM	S62.034A
ICD10CM	S62.034B
ICD10CM	S62.035A
ICD10CM	S62.035B
ICD10CM	S62.036A
ICD10CM	S62.036B
ICD10CM	S62.101A
ICD10CM	S62.101B
ICD10CM	S62.102A
ICD10CM	S62.102B
ICD10CM	S62.109A
ICD10CM	S62.109B
ICD10CM	S62.111A
ICD10CM	S62.111B
ICD10CM	S62.112A
ICD10CM	S62.112B
ICD10CM	S62.113A
ICD10CM	S62.113B
ICD10CM	S62.114A
ICD10CM	S62.114B
ICD10CM	S62.115A
ICD10CM	S62.115B
ICD10CM	S62.116A
ICD10CM	S62.116B
ICD10CM	S62.121A
ICD10CM	S62.121B
ICD10CM	S62.122A
ICD10CM	S62.122B
ICD10CM	S62.123A
ICD10CM	S62.123B
ICD10CM	S62.124A
ICD10CM	S62.124B
ICD10CM	S62.125A
ICD10CM	S62.125B
ICD10CM	S62.126A
ICD10CM	S62.126B
ICD10CM	S62.131A
ICD10CM	S62.131B
ICD10CM	S62.132A
ICD10CM	S62.132B
ICD10CM	S62.133A
ICD10CM	S62.133B
ICD10CM	S62.134A
ICD10CM	S62.134B
ICD10CM	S62.135A
ICD10CM	S62.135B
ICD10CM	S62.136A
ICD10CM	S62.136B
ICD10CM	S62.141A
ICD10CM	S62.141B
ICD10CM	S62.142A
ICD10CM	S62.142B
ICD10CM	S62.143A
ICD10CM	S62.143B
ICD10CM	S62.144A
ICD10CM	S62.144B
ICD10CM	S62.145A
ICD10CM	S62.145B
ICD10CM	S62.146A
ICD10CM	S62.146B
ICD10CM	S62.151A
ICD10CM	S62.151B
ICD10CM	S62.152A
ICD10CM	S62.152B
ICD10CM	S62.153A
ICD10CM	S62.153B
ICD10CM	S62.154A
ICD10CM	S62.154B
ICD10CM	S62.155A
ICD10CM	S62.155B
ICD10CM	S62.156A
ICD10CM	S62.156B
ICD10CM	S62.161A
ICD10CM	S62.161B
ICD10CM	S62.162A
ICD10CM	S62.162B
ICD10CM	S62.163A
ICD10CM	S62.163B
ICD10CM	S62.164A
ICD10CM	S62.164B
ICD10CM	S62.165A
ICD10CM	S62.165B
ICD10CM	S62.166A
ICD10CM	S62.166B
ICD10CM	S62.171A
ICD10CM	S62.171B
ICD10CM	S62.172A
ICD10CM	S62.172B
ICD10CM	S62.173A
ICD10CM	S62.173B
ICD10CM	S62.174A
ICD10CM	S62.174B
ICD10CM	S62.175A
ICD10CM	S62.175B
ICD10CM	S62.176A
ICD10CM	S62.176B
ICD10CM	S62.181A
ICD10CM	S62.181B
ICD10CM	S62.182A
ICD10CM	S62.182B
ICD10CM	S62.183A
ICD10CM	S62.183B
ICD10CM	S62.184A
ICD10CM	S62.184B
ICD10CM	S62.185A
ICD10CM	S62.185B
ICD10CM	S62.186A
ICD10CM	S62.186B
ICD10CM	S62.201A
ICD10CM	S62.201B
ICD10CM	S62.202A
ICD10CM	S62.202B
ICD10CM	S62.209A
ICD10CM	S62.209B
ICD10CM	S62.211A
ICD10CM	S62.211B
ICD10CM	S62.212A
ICD10CM	S62.212B
ICD10CM	S62.213A
ICD10CM	S62.213B
ICD10CM	S62.221A
ICD10CM	S62.221B
ICD10CM	S62.222A
ICD10CM	S62.222B
ICD10CM	S62.223A
ICD10CM	S62.223B
ICD10CM	S62.224A
ICD10CM	S62.224B
ICD10CM	S62.225A
ICD10CM	S62.225B
ICD10CM	S62.226A
ICD10CM	S62.226B
ICD10CM	S62.231A
ICD10CM	S62.231B
ICD10CM	S62.232A
ICD10CM	S62.232B
ICD10CM	S62.233A
ICD10CM	S62.233B
ICD10CM	S62.234A
ICD10CM	S62.234B
ICD10CM	S62.235A
ICD10CM	S62.235B
ICD10CM	S62.236A
[truncated: 2,060 more rows]
